# Supplementary material for: The emerging biofuel crop Camelina sativa retains a highly undifferentiated hexaploid genome structure
Source: PubMed Central journal article supplement — Nat Commun. 2014 Apr 23;5:3706. doi: 10.1038/ncomms4706 (PMC4015329; doi:10.1038/ncomms4706), 2014-04-23
Supplement: ncomms4706-s1.pdf [file ncomms4706-s1.pdf]

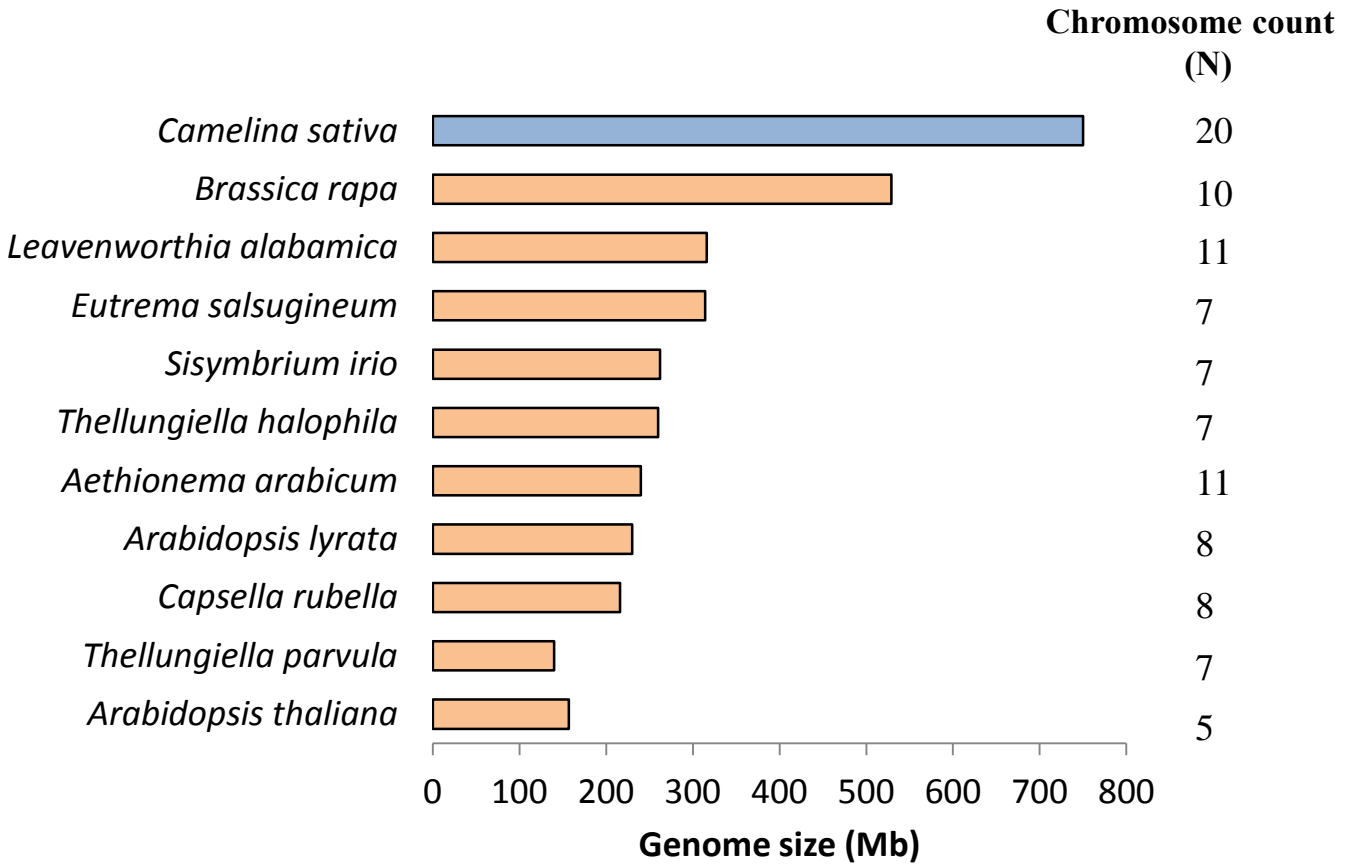

**Supplementary Fig. 1. Genome size and chromosome number of Brassicaceae species.** Genome size estimate for each Brassicaceae species was derived from published reports: *C. sativa*<sup>7</sup>, *B. rapa*<sup>29</sup>, *L. alabamica*<sup>30</sup>, *E. salsugineum*<sup>31</sup>, *S. irio*<sup>29</sup>, *T. halophila*<sup>32</sup>, *A. arabicum*<sup>30</sup>, *A. lyrata*<sup>29</sup>, *C. rubella*<sup>31</sup>, *T. parvula*<sup>33</sup> and *A. thaliana*<sup>29</sup>. Base chromosome numbers were obtained from Brassibase Database<sup>34</sup>.

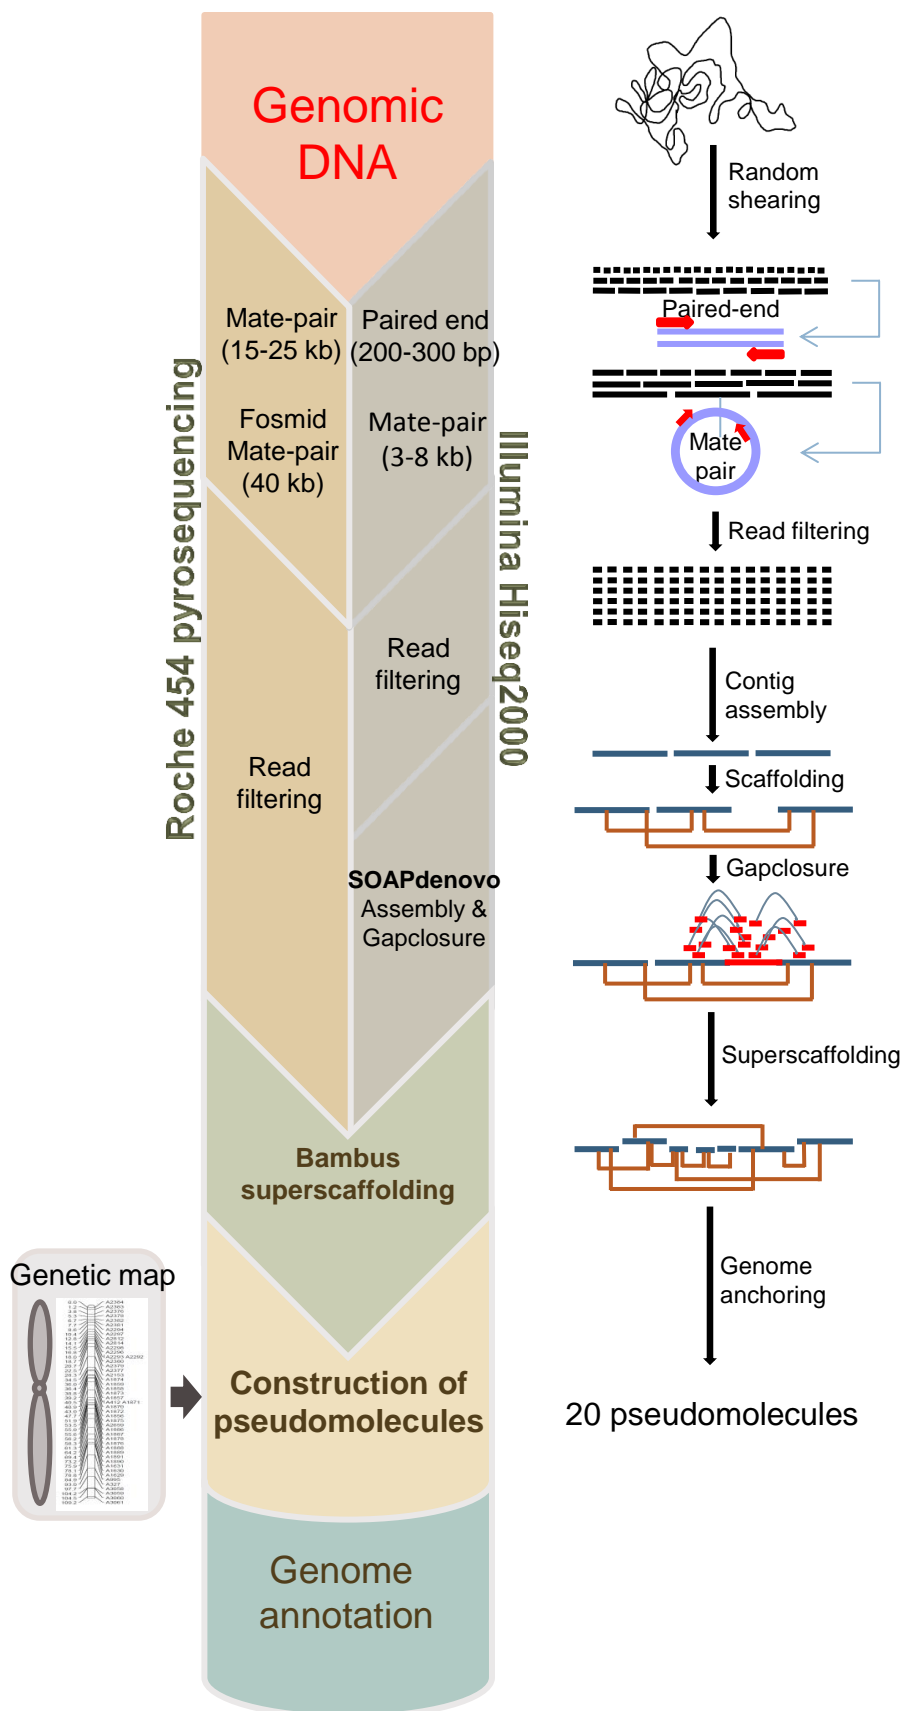

**Supplementary Fig. 2. *Camelina sativa* genome assembly workflow.** The genome of *C. sativa* was sequenced using a hybrid Illumina and Roche 454 next generation sequencing approach. The draft genome sequence was assembled using a novel hierarchical assembly strategy employing SOAPdenovo<sup>1</sup> for contig assembly and scaffolding, and Bambus<sup>2</sup> for superscaffolding. A high density genetic linkage map was utilized for the construction of chromosome scale pseudomolecules.

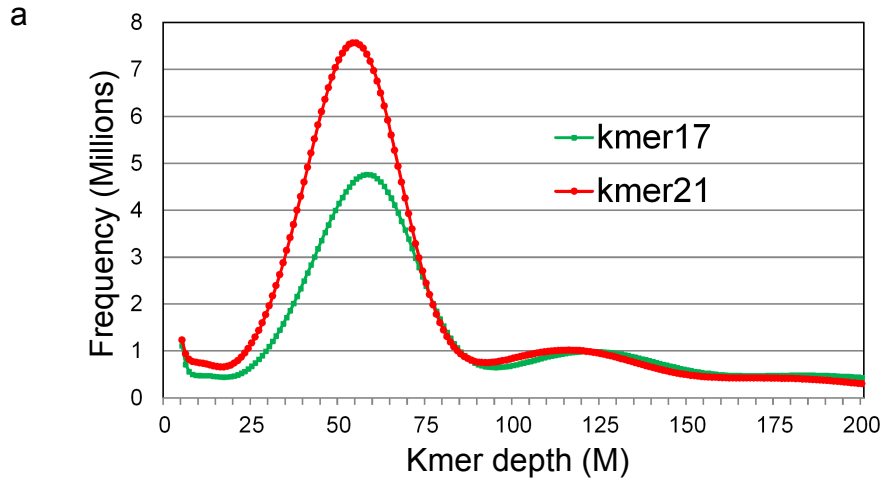

**b**

| Kmer size (bp)<br>(K) | Kmer Depth<br>(M) | Read length<br>(L) | Sequence Depth<br>[ $N=(M*L)/(L-K+1)$ ] | Total sequence length (bp)<br>(SL) | Genome size (bp)<br>(SL/N) |
|-----------------------|-------------------|--------------------|-----------------------------------------|------------------------------------|----------------------------|
| 17                    | 57.23             | 99.69              | 68.17                                   | 53,164,128,938                     | 779,860,508                |
| 21                    | 53.72             | 99.69              | 67.20                                   | 53,164,128,938                     | 791,106,457                |
|                       |                   |                    |                                         | <b>Average</b>                     | <b>785,483,483</b>         |

**Supplementary Fig. 3. Estimation of *C. sativa* genome size based on Illumina sequencing coverage**

(a) Distribution of 17- and 21mer frequency in filtered Illumina paired-end reads.

(b) Estimation of genome size based on kmer statistics. Sequencing depth (N) was estimated from the means of read length (L) and kmer frequency (M) determined by fitting a Gaussian mixture (+constant) model to the main peak. Genome size was then estimated by dividing the total sequence volume (SL) used to determine kmer frequency by sequencing depth (N).

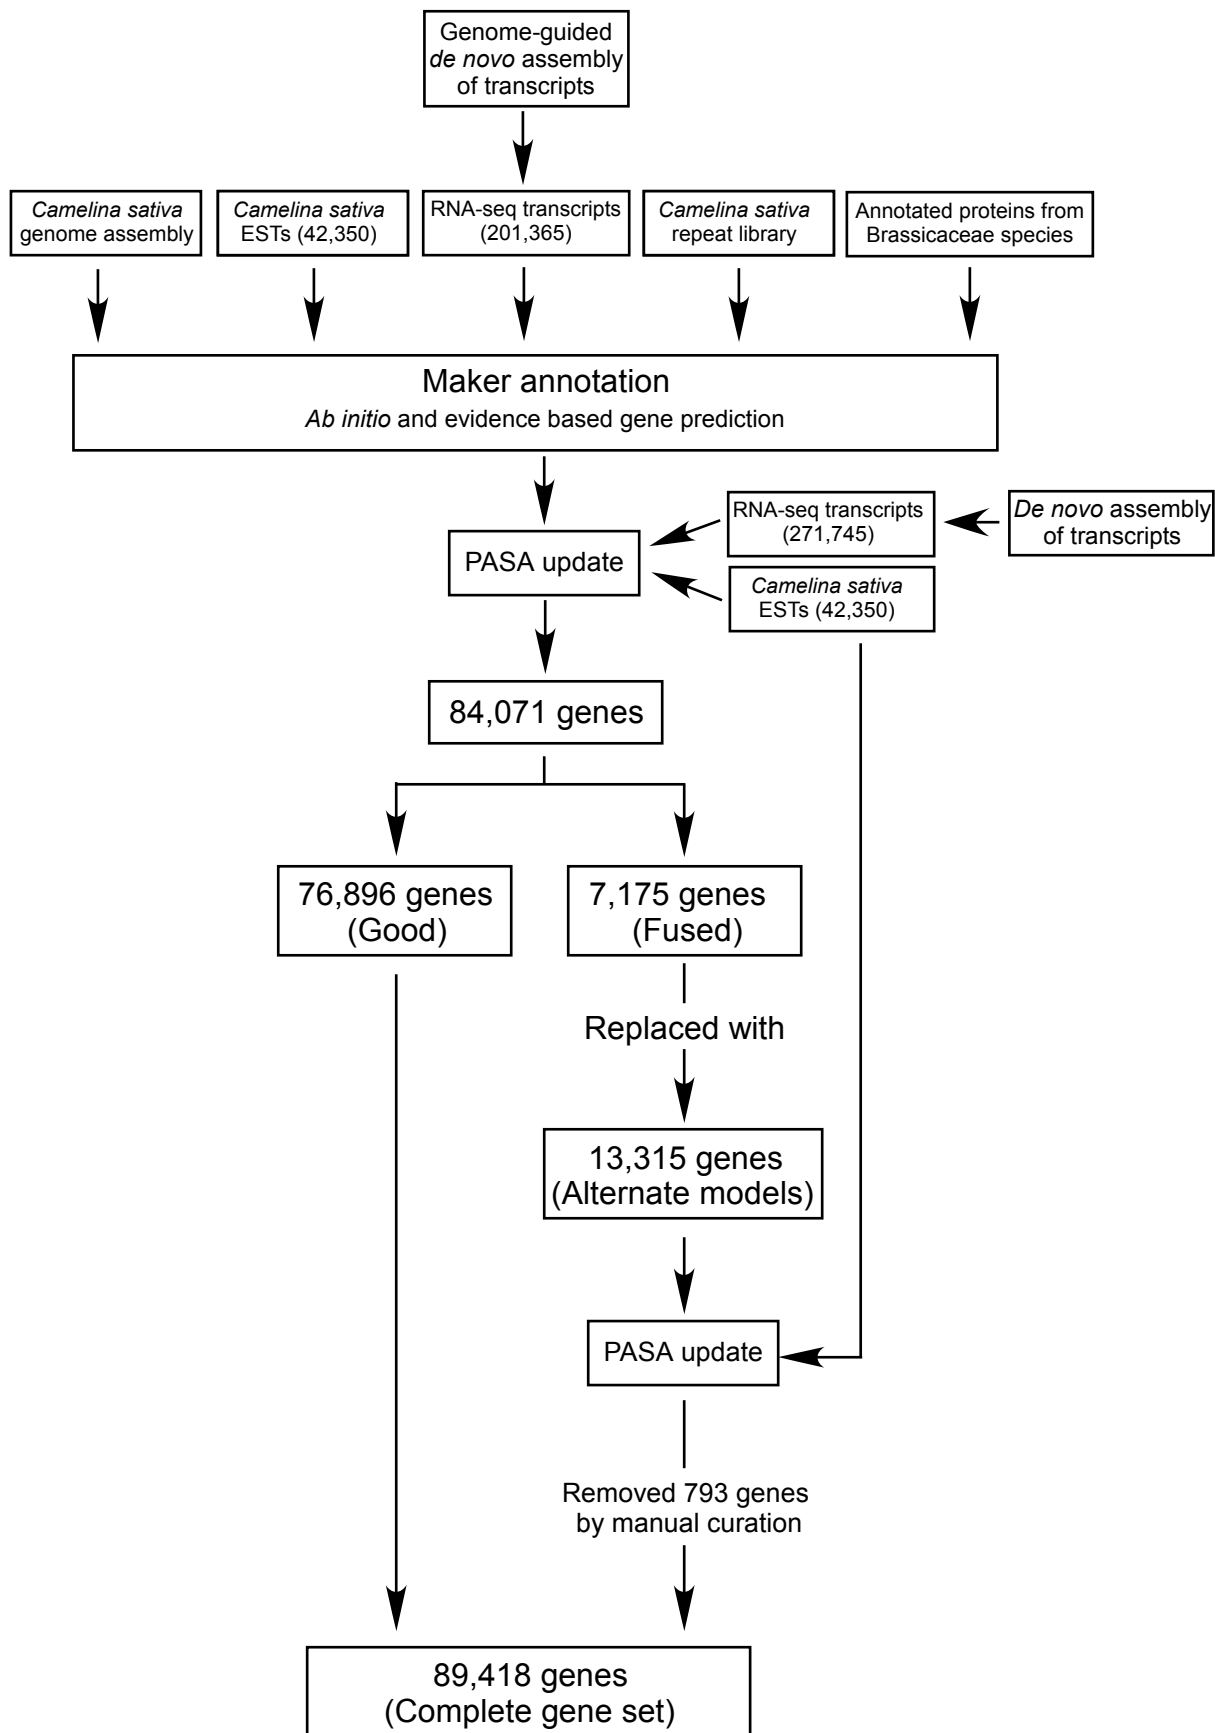

**Supplementary Fig. 4. An integrated gene annotation pipeline employed in this study.**

For annotation of protein coding genes in *Camelina sativa*, two major genome annotation pipelines Maker<sup>35</sup> and PASA<sup>36</sup> were used. To improve the accuracy of gene prediction and determine intron-exon structures, external evidence such as RNAseq transcripts and protein databases from other sequenced Brassicaceae species was used. Gene models annotated using Maker/PASA were checked for accuracy and manually curated if necessary.

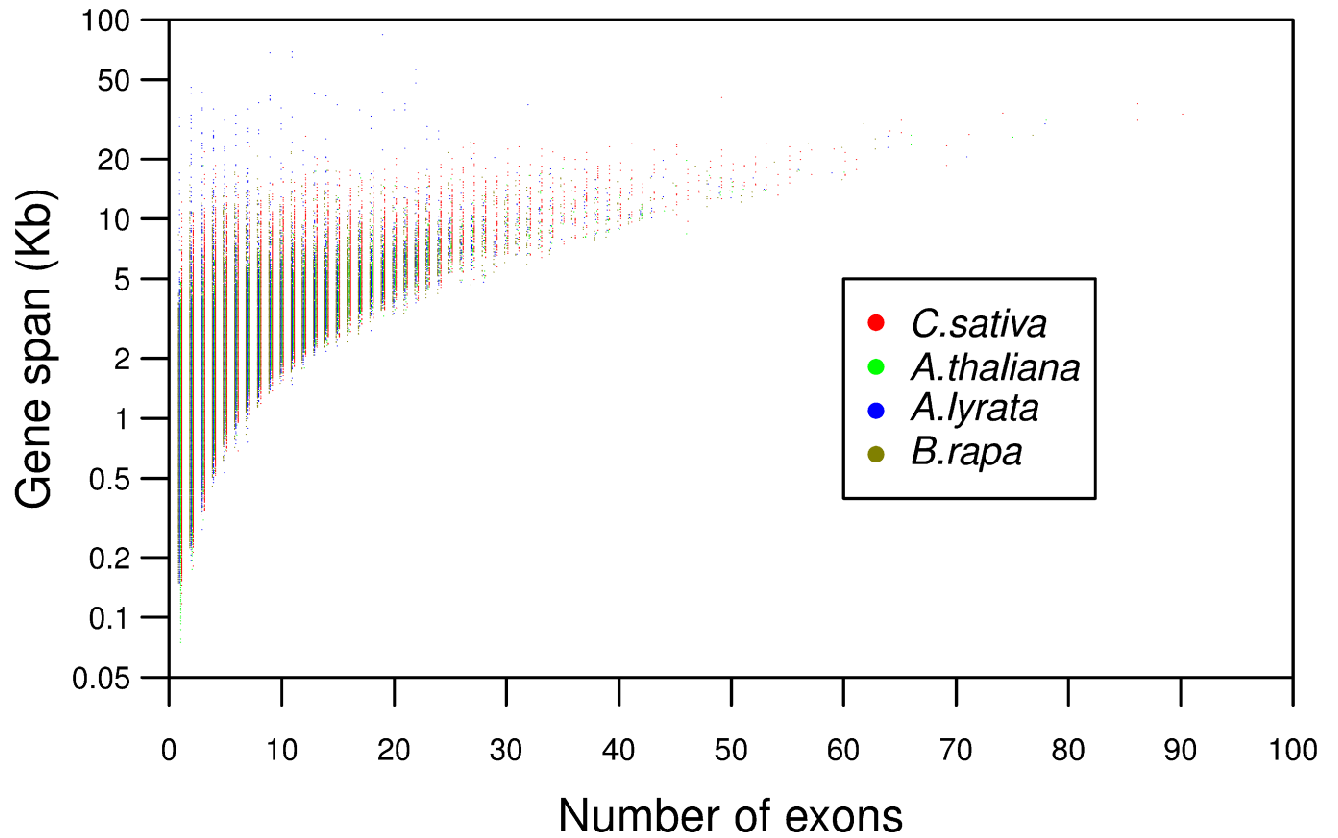

**Supplementary Fig. 5. Comparison of gene model characteristics (length of coding sequences of genes plotted against their corresponding exon number) of *C. sativa* with a subset of related Brassicaceae species, including *A. thaliana*, *A. lyrata* and *B. rapa*.**

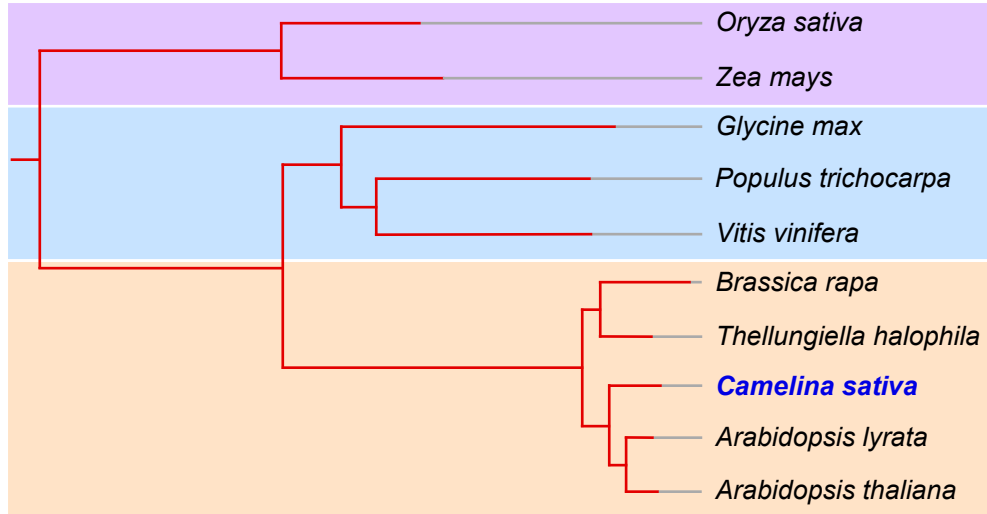

**Supplementary Fig. 6. Phylogenetic relationship of *Camelina sativa* with Brassicaceae and other angiosperm species.** A maximum likelihood tree produced from a supermatrix constructed based on 1,853 orthologous sequences in a concatenated alignment of 780,391 bp .

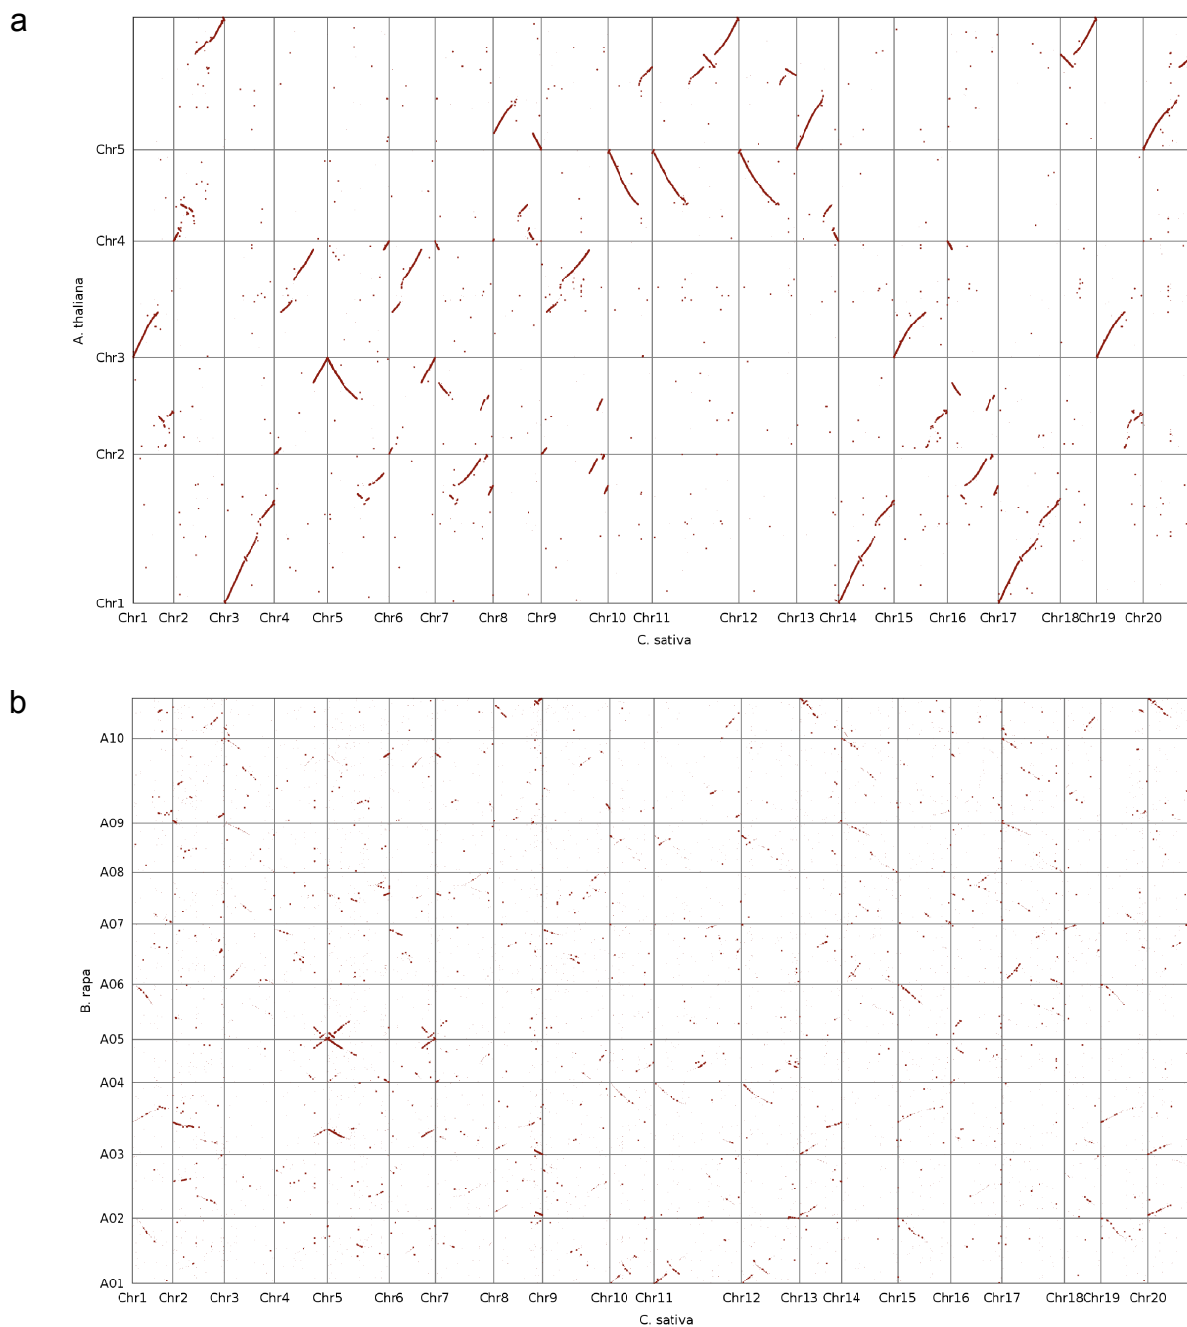

**Supplementary Fig. 7. Collinearity of *Camelina sativa* genome with *Arabidopsis thaliana* and *Brassica rapa*.** The draft genome sequence of *C. sativa* was compared to the genome sequences of related crucifer species, including *A. thaliana* (a) and *B. rapa* (b) by NUCmer<sup>7</sup>.

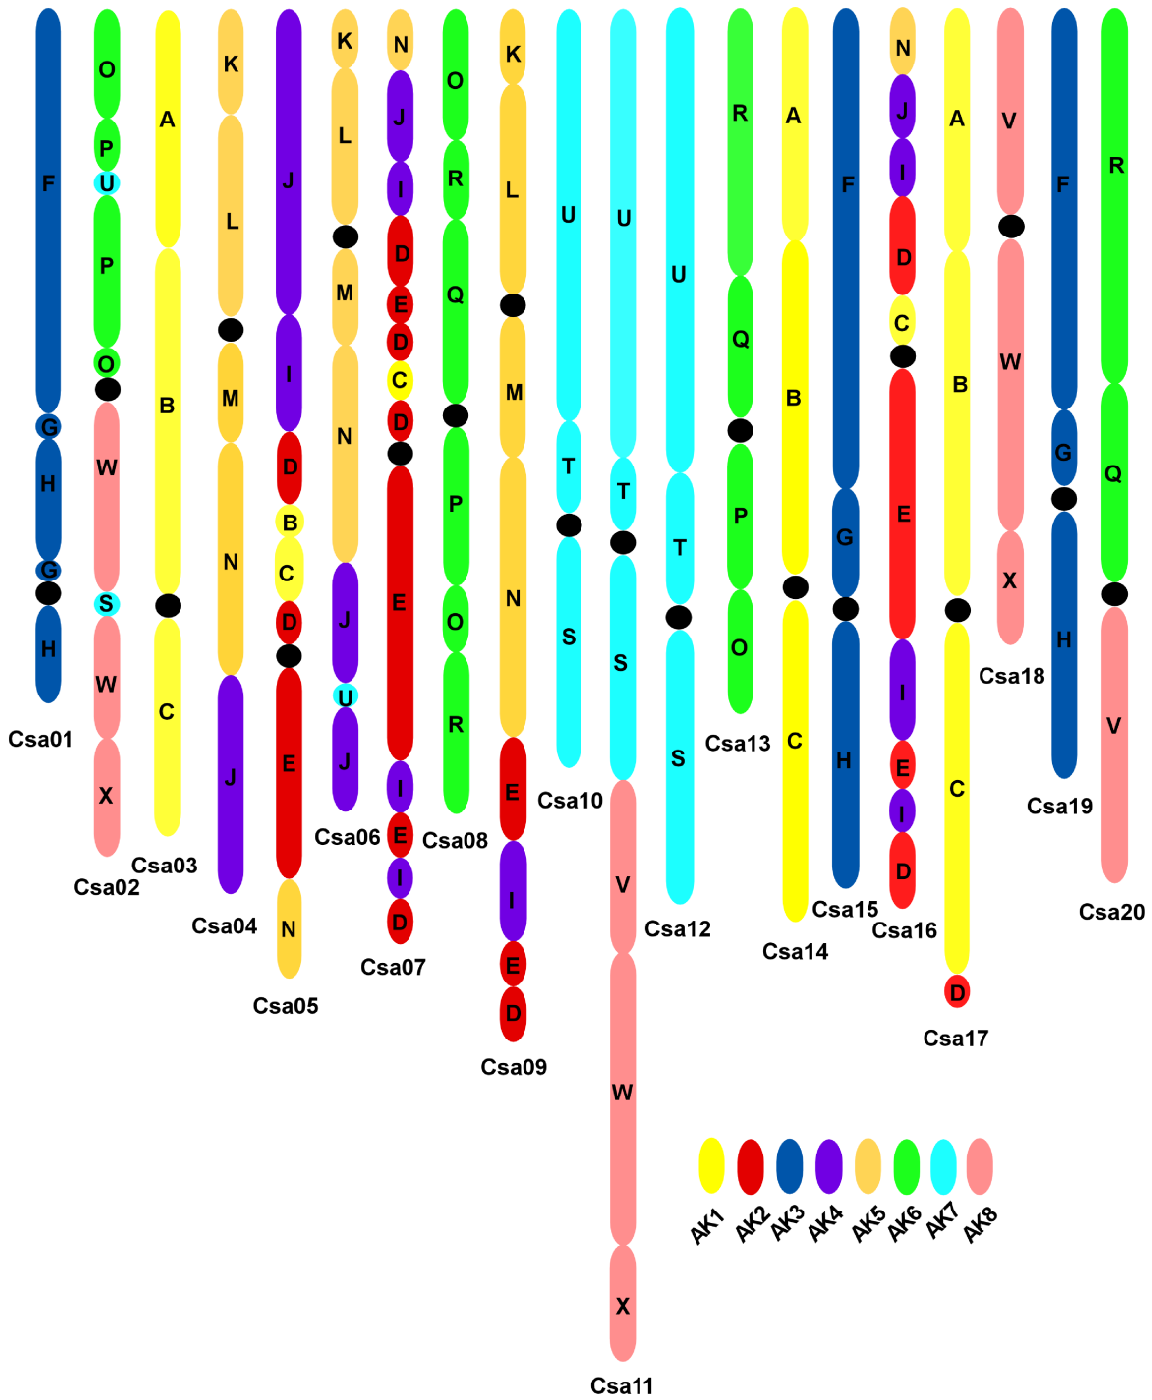

Supplementary Fig. 8. Distribution of genomic blocks (A-X) among *Camelina sativa* chromosomes.



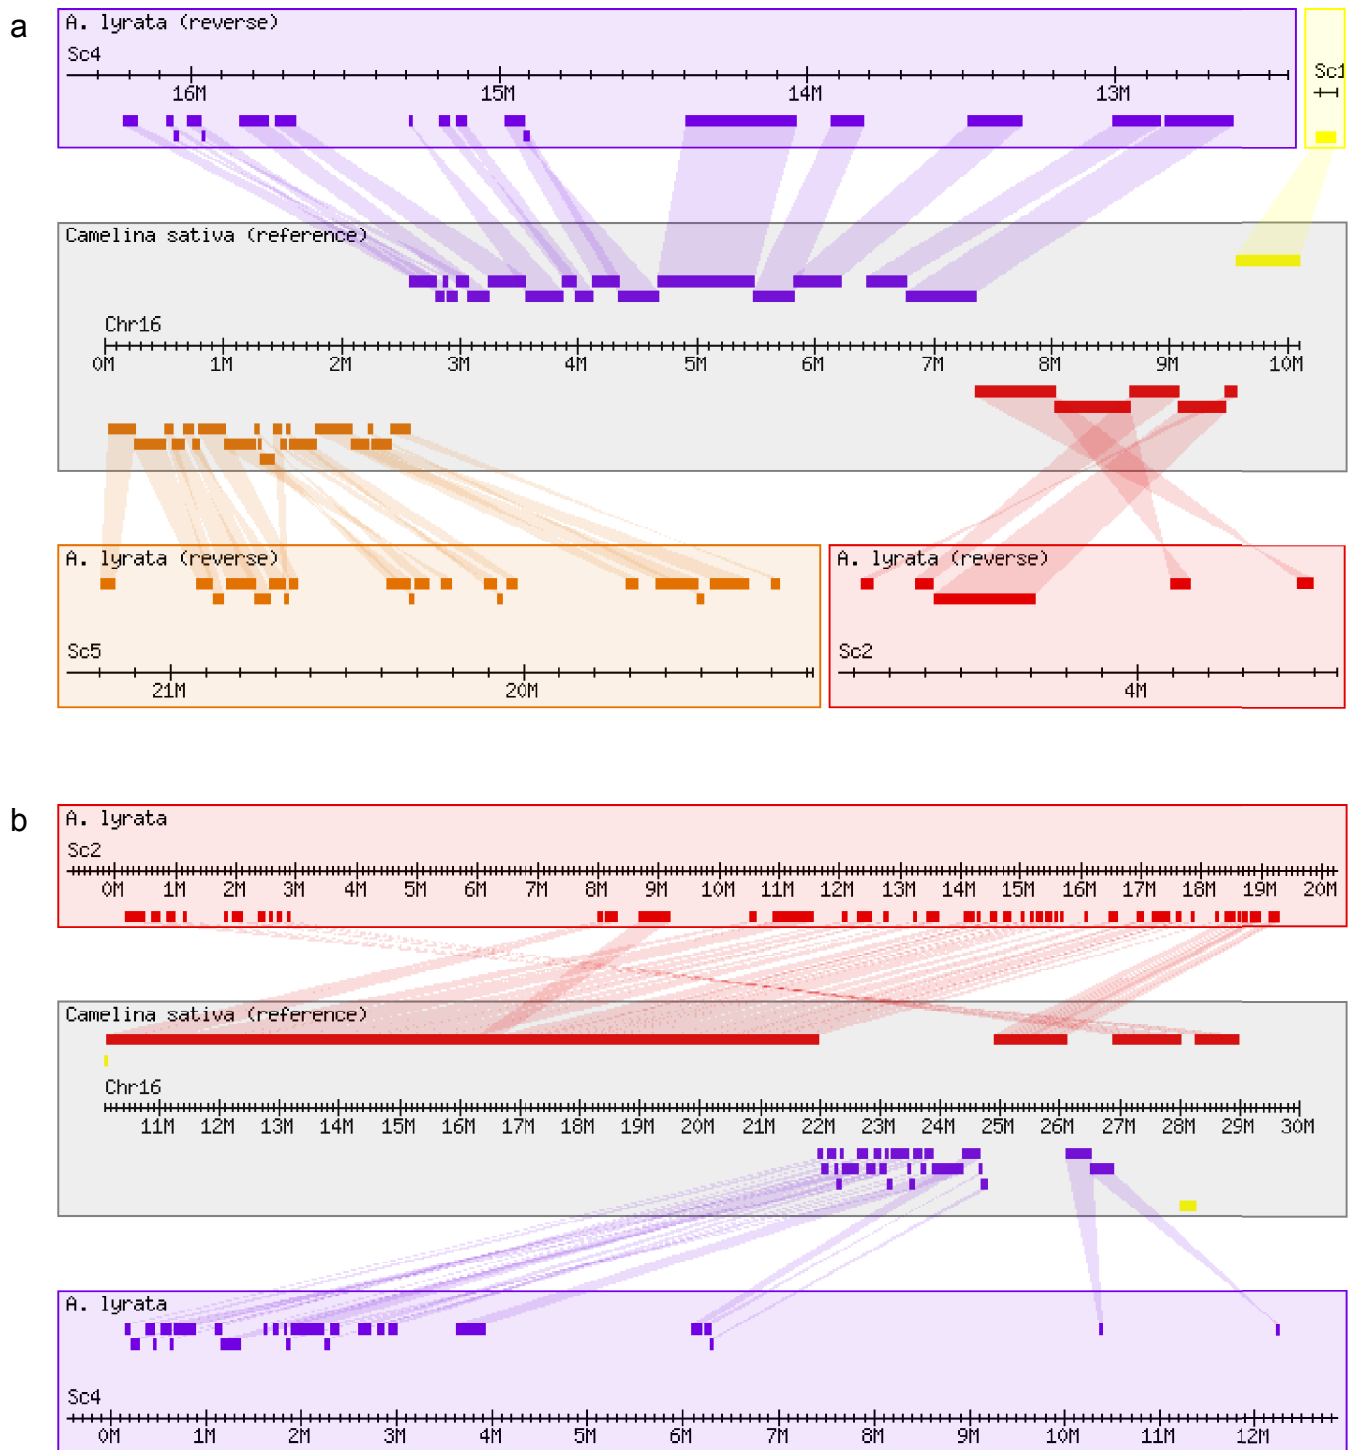

**Supplementary Fig. 9. Gbrowse-syn view of the comparison between *C. sativa* short (a) or long (b) arm of the chromosome 16 and *Arabidopsis lyrata* genome**

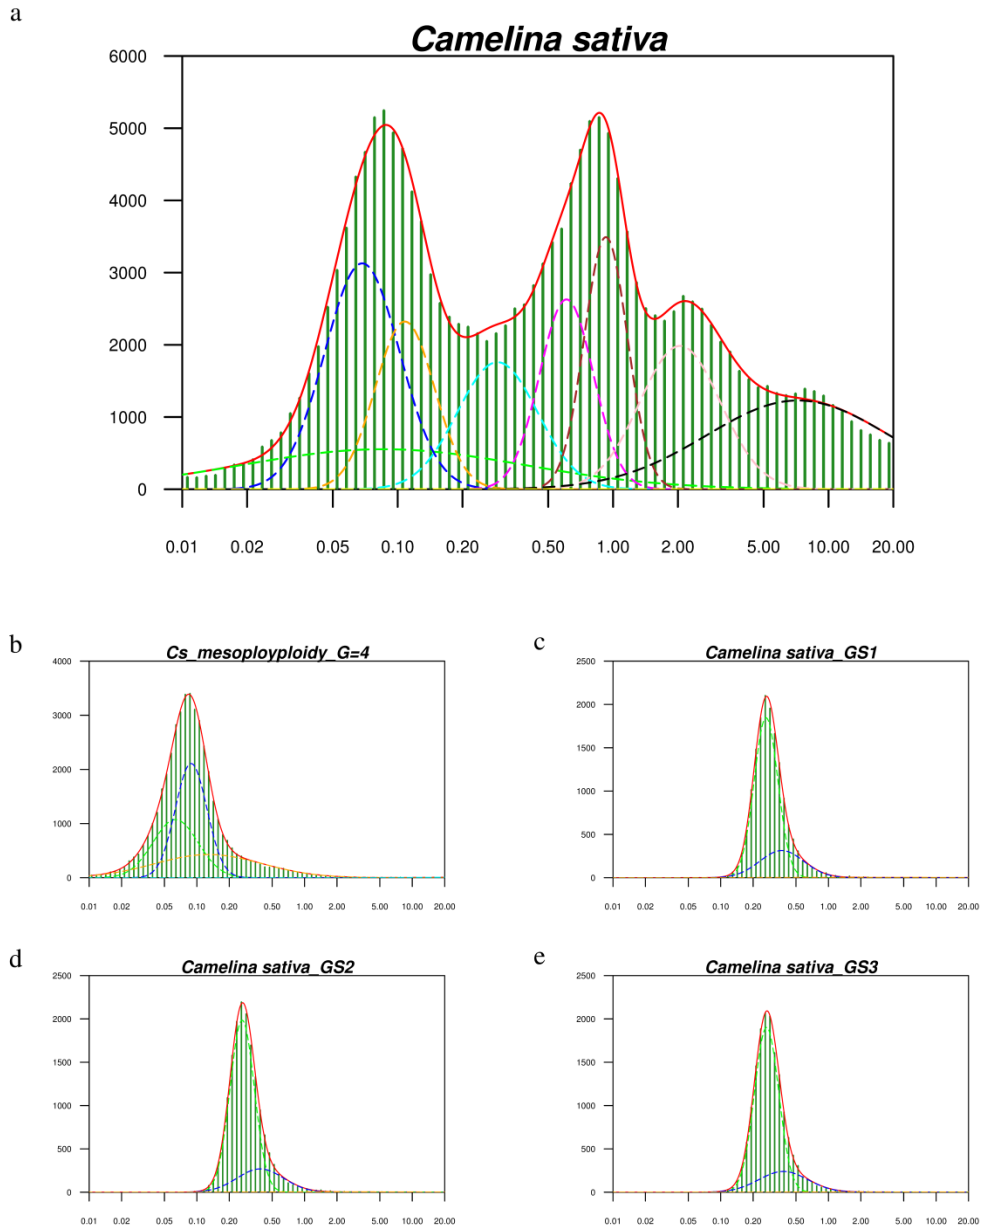

**Supplementary Fig. 10. Age distributions of paralogous and orthologous genes in *Camelina sativa* indicated by histograms showing the frequency distributions of  $K_s$  values**

(a) comparing pairs of all paralogues in *C. sativa*

(b) comparing pairs of all syntenic homologues in *C. sativa*

(c, d and e) comparing pairs of all orthologues between *C. sativa* subgenomes and *A. thaliana*.

The red line in each histogram represents the fitted mixture model with normal distribution (Gaussian) components. The dotted lines represent the individual Gaussian components. The Complete list of mixture model Gaussian components is provided in Supplementary Table 23.

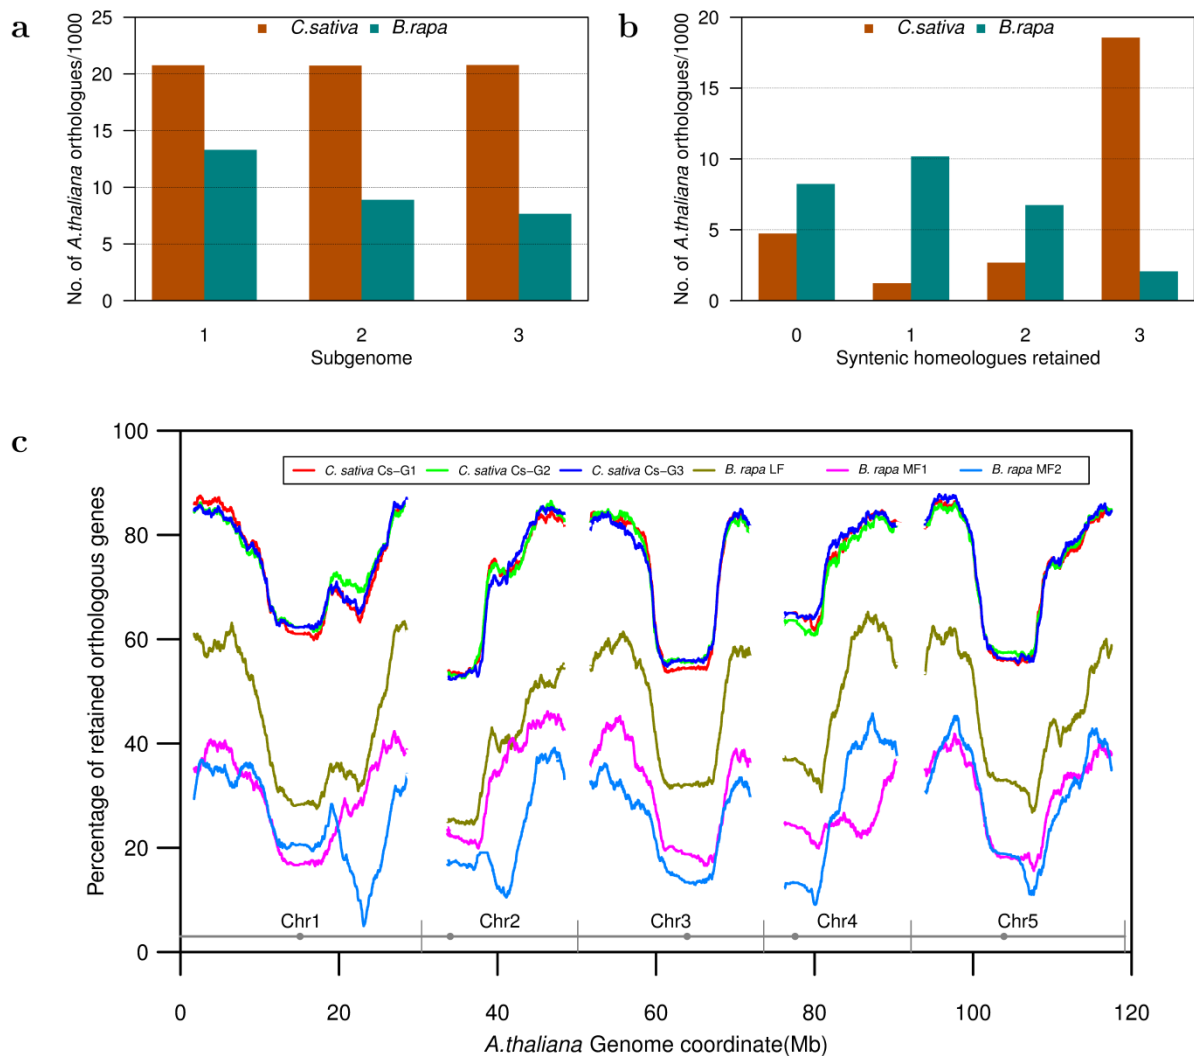

**Supplementary Fig. 11. Fractionation of genes in *C. sativa* following the whole genome triplication**

- (a) Comparison of the number of syntelogs of *A. thaliana* genes retained in the three sub-genomes of *C. sativa* (Cs-G1, 2 and 3) and *B. rapa* (LF, MF1 and MF2).
- (b) Comparison of the copy number of syntelogs of *A. thaliana* genes retained in the *C. sativa* and *B. rapa* genomes.
- (c) The density of syntelogs of *A. thaliana* retained in the three sub-genomes of *C. sativa* and *B. rapa* are shown. The X- and Y-axis represent the physical positions of the *A. thaliana* chromosomes and the percentages of retained syntelogs around each *A. thaliana* gene (average of retention of 500 genes upstream and downstream), respectively.

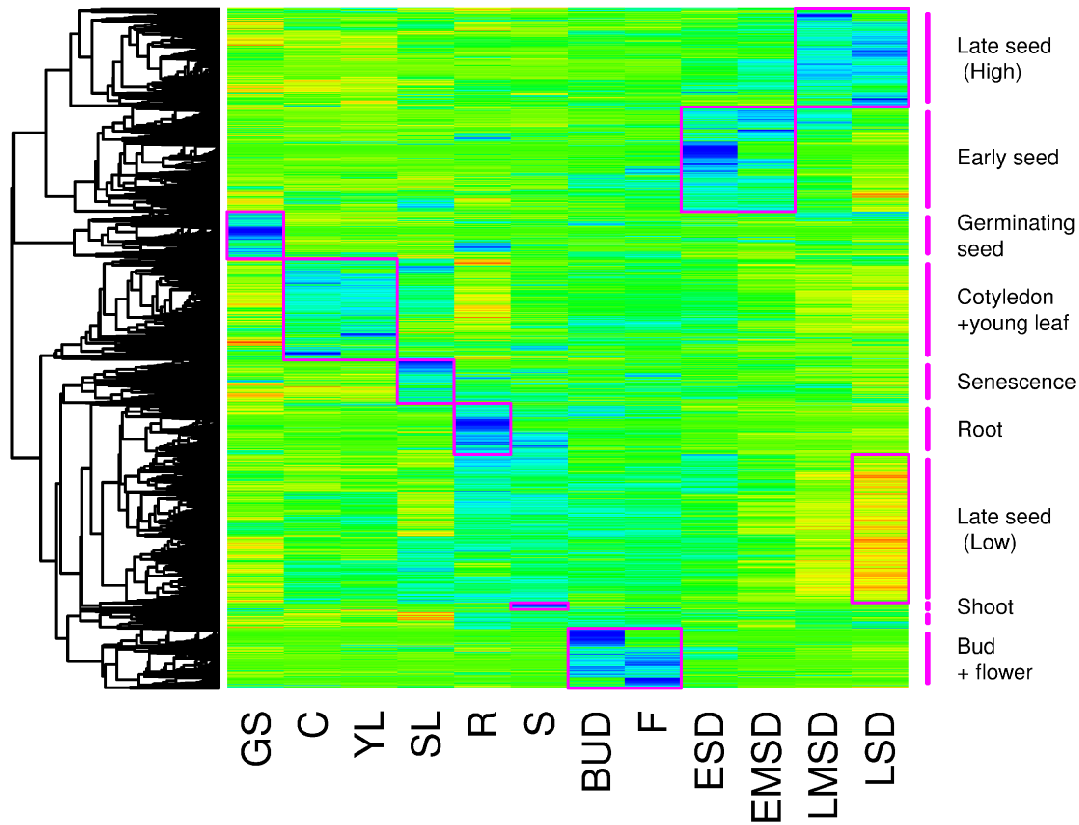

**Supplementary Fig.12. Clustering and heatmap of fully-retained genes belonging to the interaction group.**

The clustering of 12,112 genes belonging to the triplets that showed statistically significant magnitude of interaction [ $p < 0.05$  (ANOVA test for interaction);  $STDEV (G \times T \text{ random effects}) > 0.25$ ] was carried out using 1 minus the Pearson sample correlation as the distance measure. The average linkage method was used for clustering. The heatmap was drawn using the statistical package R where the colours were 256 levels of rainbow, starting with red representing low values and ending with blue representing high values. G, germinating seed; C, cotyledon; YL, young leaf; SL, senescing leaf; R, root; S, stem; F, flower; ESD, early seed development; EMSD, early-mid seed development; LMMSD, late-mid seed development; LSD, late seed development.

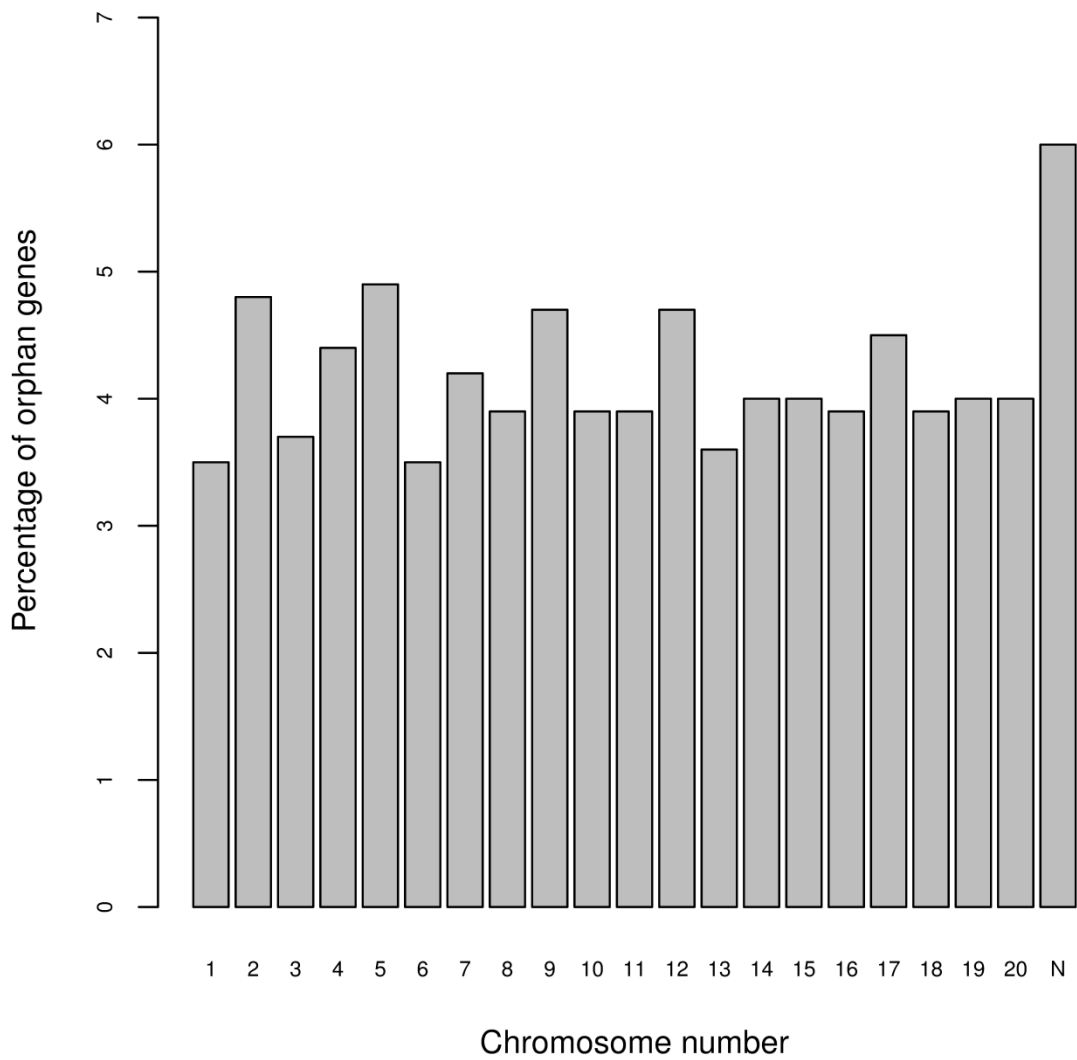

**Supplementary Fig. 13. Percentage of protein coding orphan genes on 20 chromosomes of *Camelina sativa***

Supplementary Table 1. Sequencing libraries used for genome assembly of *Camelina sativa*

**Illumina sequencing**

| Library insert size (bp)              | Average read length (bp) | Total raw data (Gb) | Total filtered data (Gb) | Sequence depth (X)* |
|---------------------------------------|--------------------------|---------------------|--------------------------|---------------------|
| <b>Paired-end libraries</b>           |                          |                     |                          |                     |
| 225                                   | 2x100                    | 7.08                | 5.57                     | 7.10                |
|                                       | 2x100                    | 12.97               | 10.92                    | 13.91               |
| 325                                   | 2x100                    | 9.04                | 7.00                     | 8.92                |
|                                       | 2x100                    | 15.58               | 12.86                    | 16.38               |
| <b>Short span mate-pair libraries</b> |                          |                     |                          |                     |
| 3000                                  | 2x100                    | 41.46               | 26.24                    | 33.43               |
| 5,000                                 | 2x100                    | 39.66               | 19.68                    | 25.07               |
| 8,000                                 | 2x100                    | 39.63               | 14.26                    | 18.17               |
| <b>Total</b>                          |                          | <b>165.42</b>       | <b>96.53</b>             | <b>122.97</b>       |

**Roche 454 sequencing**

| Library insert size (bp)               | Average read length (bp) | Total raw data (Mb) | Total reads      | Usable mate pairs |
|----------------------------------------|--------------------------|---------------------|------------------|-------------------|
| <b>Medium span mate-pair libraries</b> |                          |                     |                  |                   |
| 15Kb                                   | 282                      | 94.04               | 333,025          | 53,216            |
|                                        | 341                      | 264.96              | 769,457          | 147,941           |
|                                        | 344                      | 247.79              | 724,019          | 135,533           |
| 20Kb                                   | 254                      | 124.88              | 490,496          | 42,643            |
|                                        | 343                      | 250.62              | 730,832          | 102,406           |
|                                        | 351                      | 172.22              | 489,738          | 67,463            |
| 25Kb                                   | 344                      | 247.73              | 720,175          | 141,349           |
|                                        | 344                      | 220.45              | 639,989          | 167,086           |
| <b>Long span mate-pair libraries</b>   |                          |                     |                  |                   |
| 40 Kb                                  | 272                      | 254.22              | 720,321          | 283,634           |
|                                        | 271                      | 267.67              | 661,989          | 302,417           |
| <b>Total</b>                           |                          | <b>2,144.58</b>     | <b>6,280,041</b> | <b>1,443,688</b>  |

\*Estimated genome size=785 Mb

**Supplementary Table 2. Summary of *Camelina sativa* draft genome assembly statistics**

| Assembly Statistics            | Hierarchical genome assembly stages |                         |                                          |
|--------------------------------|-------------------------------------|-------------------------|------------------------------------------|
|                                | SOAPdenovo + Gapcloser              | Bambus superscaffolding | Pseudomolecule construction <sup>1</sup> |
| Number of scaffolds (> 200 bp) | 39,514                              | 37,871                  | 37,418                                   |
| Total span (Mb)                | 641.39                              | 641.45                  | 641.45                                   |
| Coverage (785 Mb genome)       | 81.65%                              | 81.66%                  | 81.66%                                   |
| Longest (Mb)                   | 3.91                                | 16.18                   | 49.7                                     |
| Mean length (Kb)               | 16.23                               | 16.93                   | 17.14                                    |
| Scaffold N50                   | 603.04 Kb                           | 2.16 Mb                 | 30.09 Mb                                 |
| Scaffold L50                   | 289                                 | 78                      | 10                                       |
| Contig N50                     | 33.42 Kb                            | 32.17 Kb                | 33.41 Kb                                 |
| Contig L50                     | 5,380                               | 5618                    | 5384                                     |
| GC content (%)                 | 33.99                               | 33.99                   | 33.99                                    |
| Gap length (Mb)                | 44.99                               | 45.09                   | 45.05                                    |
| Gap size (%)                   | 7.02                                | 7.03                    | 7.02                                     |

<sup>1</sup>Chromosome scale pseudomolecules were constructed by anchoring and orienting assembled scaffolds using a high resolution SNP/Indel-based genetic linkage map.

**Supplementary Table 3. Anchoring of the *Camelina sativa* genome sequence to the high density SNP/Indel-based genetic linkage map**

Genetic linkage map of *C. sativa* representing polymorphic SNP/Indel markers was constructed by restriction site associated

DNA (RAD) and Illumina GoldenGate genotyping assay approaches.

| Linkage group/<br>Pseudomolecule | Number of SNP/Indel/SSR markers |             |             | No. of anchored<br>scaffolds | Pseudomolecules size<br>(bp) | Genetic distance<br>(cM) |
|----------------------------------|---------------------------------|-------------|-------------|------------------------------|------------------------------|--------------------------|
|                                  | GoldenGate<br>assay             | RAD         | Total       |                              |                              |                          |
| CsLG01/Csa01                     | 27                              | 97          | 124         | 11                           | 23,241,285                   | 94.16                    |
| CsLG02/Csa02                     | 13                              | 123         | 136         | 39                           | 29,139,806                   | 150.88                   |
| CsLG03/Csa03                     | 36                              | 182         | 218         | 18                           | 28,500,605                   | 222.11                   |
| CsLG04/Csa04                     | 34                              | 138         | 172         | 26                           | 30,110,606                   | 177.55                   |
| CsLG05/Csa05                     | 25                              | 137         | 162         | 52                           | 34,971,402                   | 206.21                   |
| CsLG06/Csa06                     | 20                              | 68          | 88          | 14                           | 26,391,736                   | 113.98                   |
| CsLG07/Csa07                     | 31                              | 195         | 226         | 20                           | 33,617,777                   | 225.36                   |
| CsLG08/Csa08                     | 35                              | 183         | 218         | 25                           | 27,720,346                   | 212.55                   |
| CsLG09/Csa09                     | 40                              | 151         | 191         | 50                           | 38,094,978                   | 216.35                   |
| CsLG10/Csa10                     | 26                              | 176         | 202         | 14                           | 25,316,904                   | 167.20                   |
| CsLG11/Csa11                     | 58                              | 310         | 368         | 36                           | 49,703,607                   | 307.07                   |
| CsLG12/Csa12                     | 16                              | 85          | 101         | 48                           | 33,044,737                   | 118.15                   |
| CsLG13/Csa13                     | 38                              | 110         | 148         | 20                           | 24,101,694                   | 150.93                   |
| CsLG14/Csa14                     | 30                              | 195         | 225         | 23                           | 31,758,599                   | 219.05                   |
| CsLG15/Csa15                     | 20                              | 120         | 140         | 47                           | 30,521,352                   | 172.99                   |
| CsLG16/Csa16                     | 24                              | 147         | 171         | 14                           | 29,110,212                   | 197.18                   |
| CsLG17/Csa17                     | 29                              | 143         | 172         | 50                           | 35,492,130                   | 236.75                   |
| CsLG18/Csa18                     | 28                              | 101         | 129         | 13                           | 20,869,551                   | 142.84                   |
| CsLG19/Csa19                     | 25                              | 158         | 183         | 22                           | 26,736,940                   | 186.02                   |
| CsLG20/Csa20                     | 24                              | 177         | 201         | 46                           | 30,099,736                   | 188.36                   |
| <b>Total</b>                     | <b>579</b>                      | <b>2996</b> | <b>3575</b> | <b>588</b>                   | <b>608,544,003</b>           | <b>3705.69</b>           |
| <b>Unanchored scaffolds</b>      |                                 |             |             | <b>37398</b>                 | <b>32,908,259</b>            |                          |



**Supplementary Table 4. Summary of the *Camelina sativa* genome features**

---

| <b>Features</b>                              |                  |
|----------------------------------------------|------------------|
| <b>Genome assembly</b>                       |                  |
| Predicted genome size                        | 785.50 Mb        |
| Assembled genome span                        | 641.45 Mb        |
| Genome coverage                              | 81.66%           |
| Number of scaffolds (>200 bp)                | 37,418           |
| Number of scaffolds (>2 kb)                  | 1,561            |
| Number of contigs                            | 71,834           |
| Scaffold N50                                 | 30.09 Mb         |
| Contig N50                                   | 33.41 Kb         |
| Gap length                                   | 45.04 Mb         |
| Gap size                                     | 7.02%            |
| GC content                                   | 33.99%           |
| <b>Genetic map and scaffold anchoring</b>    |                  |
| Number of polymorphic markers                | 3,575            |
| No. of pseudomolecules/linkage groups        | 20               |
| Anchored genome size                         | 608.54 Mb/94.87% |
| Unanchored genome size                       | 32.90 Mb/5.13%   |
| Longest pseudomolecule (CsChr11)             | 49.70 Mb         |
| Shortest pseudomolecule (CsChr18)            | 20.86 Mb         |
| <b>Genome annotation</b>                     |                  |
| Gene span                                    | 213.8 Mb         |
| Number of predicted genes                    | 89,418           |
| Number of gene models                        | 94,495           |
| Gene encoding alternatively spliced variants | 4,753 (5.3%)     |
| Genes on chromosomes                         | 85,274 (95.36%)  |
| Genes on unanchored scaffolds                | 4,144 (4.63%)    |
| Mean gene length                             | 2391 bp          |
| Mean predicted ORF length                    | 1223 bp          |
| <b>Repeat annotation</b>                     |                  |
| Total transposable elements                  | 180.1 Mb (28%)   |
| Retrotransposons                             | 123.5 Mb (19%)   |
| DNA transposons                              | 21.0 Mb (3%)     |
| Unclassified                                 | 32.6 Mb (5%)     |

---

**Supplementary Table 5. Assessment of the quality of the *Camelina sativa* genome assembly by aligning it with Baterial artificial chromosomes (BAC) sequences**

Slightly lower identity percentages were due to the gaps in both *C. sativa* assembly and BAC scaffold sequences

| <b>BAC Scaffold number</b> | <b><i>C. sativa</i> Chromosome aligned</b> | <b>% identity</b> | <b>BAC Scaffold number</b> | <b><i>C. sativa</i> Chromosome aligned</b> | <b>% identity</b> | <b>BAC Scaffold number</b> | <b><i>C. sativa</i> Chromosome aligned</b> | <b>% identity</b> |
|----------------------------|--------------------------------------------|-------------------|----------------------------|--------------------------------------------|-------------------|----------------------------|--------------------------------------------|-------------------|
| 1                          | Chr7                                       | 94.7594           | 28                         | Chr15                                      | 98.3786           | 55                         | Chr20                                      | 98.04             |
| 2                          | Chr11                                      | 91.5403           | 29                         | Chr13                                      | 90.5067           | 56                         | Chr20                                      | 94.3869           |
| 3                          | Chr14                                      | 97.2046           | 30                         | Chr5                                       | 92.1088           | 57                         | Chr12                                      | 97.869            |
| 4                          | Chr14                                      | 96.2752           | 31                         | Chr6                                       | 96.8471           | 58                         | Chr15                                      | 94.1187           |
| 5                          | Chr2                                       | 91.0852           | 32                         | Chr2                                       | 89.9192           | 59                         | Chr16                                      | 99.8078           |
| 6                          | Chr14                                      | 90.629            | 33                         | Chr5                                       | 89.8238           | 60                         | Chr5                                       | 92.71             |
| 7                          | Chr19                                      | 95.9205           | 34                         | Chr6                                       | 98.0294           | 61                         | Chr2                                       | 90.1238           |
| 8                          | Chr6                                       | 97.6735           | 35                         | Chr5                                       | 95.598            | 62                         | Chr12                                      | 97.1042           |
| 9                          | Chr19                                      | 98.8106           | 36                         | Chr5                                       | 91.5759           | 63                         | Chr7                                       | 99.1329           |
| 10                         | Chr15                                      | 97.3878           | 37                         | Chr10                                      | 95.04             | 64                         | Chr4                                       | 98.49             |
| 11                         | Chr14                                      | 93.2389           | 38                         | Chr5                                       | 90.8525           | 65                         | Chr13                                      | 97.8684           |
| 12                         | Chr13                                      | 95.9456           | 39                         | Chr3                                       | 91.2544           | 66                         | Chr12                                      | 94.4231           |
| 13                         | Chr1                                       | 92.4452           | 40                         | Chr18                                      | 98.3567           | 67                         | Chr12                                      | 97.7118           |
| 14                         | Chr5                                       | 89.1346           | 41                         | Chr12                                      | 93.8675           | 68                         | Chr4                                       | 95.3103           |
| 15                         | Chr11                                      | 95.0806           | 42                         | Chr7                                       | 96.375            | 69                         | Chr19                                      | 90.6737           |
| 16                         | Chr11                                      | 91.36             | 43                         | Chr20                                      | 89.9744           | 70                         | Chr14                                      | 97.0086           |
| 17                         | Chr13                                      | 97.8254           | 44                         | Chr3                                       | 91.0748           | 71                         | Chr2                                       | 90.9054           |
| 18                         | Chr10                                      | 95.9774           | 45                         | Chr12                                      | 96.9729           | 72                         | Chr7                                       | 98.0056           |
| 19                         | Chr8                                       | 90.3522           | 46                         | Chr9                                       | 91.6987           | 73                         | Chr20                                      | 95.4435           |
| 20                         | Chr20                                      | 94.5386           | 47                         | Chr12                                      | 97.5814           | 74                         | Chr14                                      | 94.1021           |
| 21                         | Chr2                                       | 90.1989           | 48                         | Chr19                                      | 92.0881           | 75                         | Chr12                                      | 97.2943           |
| 22                         | Chr7                                       | 95.5662           | 49                         | Chr9                                       | 96.4484           | 76                         | Chr16                                      | 96.9023           |
| 23                         | Chr9                                       | 89.1141           | 50                         | Chr6                                       | 95.916            | 77                         | Chr2                                       | 93.8778           |
| 24                         | Chr13                                      | 99.0869           | 51                         | Chr20                                      | 98.7038           | 78                         | Chr9                                       | 97.0446           |
| 25                         | Chr2                                       | 97.5267           | 52                         | Chr4                                       | 97.9479           | 79                         | Chr3                                       | 95.4374           |
| 26                         | Chr6                                       | 98.1808           | 53                         | Chr5                                       | 90.4718           | 80                         | Chr12                                      | 95.115            |
| 27                         | Chr9                                       | 94.4005           | 54                         | Chr9                                       | 99.874            | 81                         | Chr18                                      | 97.0116           |

Supplementary Table 6. Alignment of Illumina short read sequences onto the *Camelina sativa* genome assembly.

| Library insert size (bp) |       | Number of filtered reads | Assembled reads |            | Unassembled reads |            |
|--------------------------|-------|--------------------------|-----------------|------------|-------------------|------------|
|                          |       |                          | Number          | %          | Number            | %          |
| <b>Paired end reads</b>  |       |                          |                 |            |                   |            |
| 225                      | Read1 | 82,582,236               | 75,675,263      | 92%        | 6,906,973         | 8%         |
|                          | Read2 | 82,582,236               | 75,754,992      | 92%        | 6,827,244         | 8%         |
| 325                      | Read1 | 99,709,678               | 91,406,657      | 92%        | 8,303,021         | 8%         |
|                          | Read2 | 99,709,678               | 91,506,659      | 92%        | 8,203,019         | 8%         |
| <b>Mate pair reads</b>   |       |                          |                 |            |                   |            |
| 3,000                    | Read1 | 134,056,177              | 103,881,069     | 77%        | 30,175,108        | 23%        |
|                          | Read2 | 134,056,177              | 104,470,910     | 78%        | 29,585,267        | 22%        |
| 5,000                    | Read1 | 100,853,282              | 79,926,033      | 79%        | 20,927,249        | 21%        |
|                          | Read2 | 100,853,282              | 81,222,281      | 81%        | 19,631,001        | 19%        |
| 8,000                    | Read1 | 73,866,314               | 58,796,501      | 80%        | 15,069,813        | 20%        |
|                          | Read2 | 73,866,314               | 59,308,871      | 80%        | 14,557,443        | 20%        |
| <b>Total/Average</b>     |       | 982,135,374              | 821,949,236     | <b>84%</b> | 160,186,138       | <b>16%</b> |

**Supplementary Table 7. Genomic mapping of *Camelina sativa* EST and 454 read sequences**

| <b>Sequences</b> |               |                                 | <b>Alignment statistics</b> |                                  |                                  |
|------------------|---------------|---------------------------------|-----------------------------|----------------------------------|----------------------------------|
| <b>Type</b>      | <b>Number</b> | <b>Total sequence data (bp)</b> | <b>Number</b>               | <b>Average sequence coverage</b> | <b>Average sequence identity</b> |
| Sanger ESTs      | 10,254        | 9,272,068                       | 10,167                      | 94.53%                           | 99.21%                           |
| 454 ESTs         | 32,096        | 27,431,012                      | 32,013                      | 91.45%                           | 98.43%                           |

**Supplementary Table 8. Assessment of completeness, continuity and coverage of gene space in *Camelina sativa* assembly by CEGMA analysis**

Core eukaryotic gene (CEG) set includes 248 gene models which are divided into four subsets based on their degree of protein sequence conservation. Group 1 represents the least conserved of all 248 CEGs, with the degree of conservation increasing in subsequent groups through to group 4.

| CEG classification | Number of CEGs | Full-length CEGs mapped in the genome |       |
|--------------------|----------------|---------------------------------------|-------|
|                    |                | Number                                | %     |
| Group 1            | 66             | 66                                    | 100   |
| Group 2            | 56             | 55                                    | 98.21 |
| Group 3            | 61             | 61                                    | 100   |
| Group 4            | 65             | 65                                    | 100   |
| Total              | 248            | 247                                   | 99.55 |

**Supplementary Table 9. Classification and composition of transposable elements in the *Camelina sativa* genome**

| <b>RepeatClass</b>              | <b>MaskedBase</b> | <b>Copy number</b> | <b>%assembly</b> |
|---------------------------------|-------------------|--------------------|------------------|
| <b>Retrotransposons</b>         |                   |                    |                  |
| <b>LTR-Retrotransposons</b>     |                   |                    |                  |
| LTR/Gypsy                       | 65,416,672        | 90,542             | 10.20%           |
| LTR/Copia                       | 22,792,697        | 36,390             | 3.55%            |
| RC/Helitron                     | 13,003,747        | 42,924             | 2.03%            |
| LTR/ERV1                        | 1,374,909         | 3,126              | 0.21%            |
| LTR                             | 1,951,951         | 4,993              | 0.30%            |
| LTR/ERVK                        | 207,933           | 556                | 0.03%            |
| LTR/Caulimovirus                | 162,201           | 122                | 0.03%            |
| <b>Non-LTR-Retrotransposons</b> |                   |                    |                  |
| LINE/L1                         | 18,373,883        | 26,010             | 2.86%            |
| LINE/I                          | 32,947            | 156                | 0.01%            |
| SINE/tRNA                       | 152,338           | 1,107              | 0.02%            |
| SINE                            | 65,241            | 166                | 0.01%            |
| <b>DNA transposons</b>          |                   |                    |                  |
| DNA/MULE-MuDR                   | 3,838,798         | 13,799             | 0.60%            |
| DNA/MuDR                        | 3,719,444         | 7,127              | 0.58%            |
| DNA/En-Spm                      | 3,107,100         | 5,886              | 0.48%            |
| DNA/hAT-Ac                      | 2,822,522         | 10,735             | 0.44%            |
| DNA                             | 1,707,516         | 7,632              | 0.27%            |
| DNA/TcMar-Pogo                  | 1,403,636         | 5,416              | 0.22%            |
| DNA/Harbinger                   | 1,262,516         | 3,869              | 0.20%            |
| DNA/CMC-EnSpm                   | 1,187,831         | 5,239              | 0.19%            |
| DNA/hAT-Tag1                    | 630,879           | 3,217              | 0.10%            |
| DNA/PIF-Harbinger               | 450,943           | 1,120              | 0.07%            |
| DNA/hAT                         | 382,624           | 1,891              | 0.06%            |
| DNA/TcMar-Stowaway              | 310,341           | 1,599              | 0.05%            |
| DNA/TcMar-Mariner               | 128,706           | 739                | 0.02%            |
| DNA/TcMar                       | 55,952            | 262                | 0.01%            |
| <b>Satellites</b>               | 2,253,299         | 2,856              | 0.35%            |
| <b>Simple_repeats</b>           | 324,100           | 1,294              | 0.05%            |
| <b>Other/Composites</b>         | 317,323           | 1,751              | 0.05%            |
| <b>Unclassified elements</b>    | 32,686,651        | 143,788            | 5.10%            |
| Total                           | 180,124,700       | 424,312            | 28.08%           |

**Supplementary Table 10. RNAseq libraries used for transcriptome characterization of the *Camelina sativa***

| <b>Growth stages</b>                           | <b>Replicate Number</b> | <b>Average read length (bp)</b> | <b>Total raw data (bp)</b> | <b>Total filtered data (bp)</b> |
|------------------------------------------------|-------------------------|---------------------------------|----------------------------|---------------------------------|
| <b>Vegetative</b>                              |                         |                                 |                            |                                 |
| Germinating seed (GS)                          | 1                       | 2x100                           | 4,827,561,200              | 4,412,077,343                   |
|                                                | 2                       | 2x100                           | 9,678,451,800              | 8,887,406,459                   |
|                                                | 3                       | 2x100                           | 470,856,800                | 428,774,166                     |
| Cotyledon ( C)                                 | 1                       | 2x100                           | 1,575,872,200              | 1,458,855,242                   |
|                                                | 2                       | 2x100                           | 2,373,721,600              | 2,195,340,661                   |
|                                                | 3                       | 2x100                           | 6,796,837,400              | 6,263,802,383                   |
| Young leaf (YL; two week old seedling)         | 1                       | 2x100                           | 1,390,013,400              | 1,327,940,893                   |
|                                                | 2                       | 2x100                           | 1,388,316,800              | 1,330,537,403                   |
|                                                | 3                       | 2x100                           | 3,085,135,200              | 2,946,287,373                   |
| Senescing leaf (OL; eight week old seedling)   | 1                       | 2x100                           | 898,662,800                | 861,002,057                     |
|                                                | 2                       | 2x100                           | 1,901,790,400              | 1,819,475,986                   |
|                                                | 3                       | 2x100                           | 1,556,933,000              | 1,489,005,380                   |
| Root ( R; four week old seedling)              | 1                       | 2x100                           | 3,006,788,600              | 2,873,976,582                   |
|                                                | 2                       | 2x100                           | 2,717,533,800              | 2,598,433,059                   |
|                                                | 3                       | 2x100                           | 2,778,536,800              | 2,659,203,079                   |
| Stem (S; four week old seedling)               | 1                       | 2x100                           | 2,560,075,000              | 2,454,066,142                   |
|                                                | 2                       | 2x100                           | 1,864,700,800              | 1,786,277,633                   |
|                                                | 3                       | 2x100                           | 2,220,999,600              | 2,123,131,915                   |
| <b>Reproductive</b>                            |                         |                                 |                            |                                 |
| Bud (B)                                        | 1                       | 2x100                           | 863,765,800                | 805,934,907                     |
|                                                | 2                       | 2x100                           | 689,403,400                | 644,811,841                     |
|                                                | 3                       | 2x100                           | 1,946,654,200              | 1,817,691,599                   |
| Flower (F)                                     | 1                       | 2x100                           | 641,596,200                | 600,591,560                     |
|                                                | 2                       | 2x100                           | 1,403,225,000              | 1,311,005,059                   |
|                                                | 3                       | 2x100                           | 2,626,887,000              | 2,467,539,986                   |
| Early seed development (ESD; 4-12 DPA*)        | 1                       | 2x100                           | 1,740,685,600              | 1,636,306,370                   |
|                                                | 2                       | 2x100                           | 1,538,385,000              | 1,454,376,957                   |
|                                                | 3                       | 2x100                           | 865,246,600                | 796,885,652                     |
| Early-mid seed development (EMSD; 18 & 22 DPA) | 1                       | 2x100                           | 1,047,840,600              | 950,936,443                     |
|                                                | 2                       | 2x100                           | 2,279,660,600              | 2,147,754,756                   |
|                                                | 3                       | 2x100                           | 1,658,205,600              | 1,571,110,448                   |
| Late-mid seed development (LMSD; 26 & 30 DPA)  | 1                       | 2x100                           | 1,648,937,800              | 1,570,446,299                   |
|                                                | 2                       | 2x100                           | 2,445,500,800              | 2,319,358,756                   |
|                                                | 3                       | 2x100                           | 1,429,953,400              | 1,351,795,713                   |
| Late seed development (LSD; 32 & 40 DPA)       | 1                       | 2x100                           | 1,556,199,800              | 1,479,035,186                   |
|                                                | 2                       | 2x100                           | 1,522,260,400              | 1,419,733,552                   |
|                                                | 3                       | 2x100                           | 1,513,994,600              | 1,433,853,177                   |
| <b>Total</b>                                   |                         |                                 | <b>78,511,189,600</b>      | <b>73,694,762,017</b>           |

\*days post anthesis

**Supplementary Table 11. A comparison of genome composition of Brassicaceae species**

| <b>Genome composition</b>   | <i>Camelina sativa</i> | <i>Arabidopsis lyrata</i> | <i>Arabidopsis thaliana</i> | <i>Brassica rapa</i> |
|-----------------------------|------------------------|---------------------------|-----------------------------|----------------------|
| Genome size (Mb; assembled) | 641.45                 | 207                       | 120                         | 283.8                |
| Genic (%)                   | 31.33                  | 28.7                      | 42.3                        | 29                   |
| Intergenic (%)              | 38.58                  | 41.6                      | 34                          | 31.4                 |
| Transposable elements (%)   | 28.08                  | 29.7                      | 23.7                        | 39.5                 |
| No. of genes                | 89,418                 | 32,670                    | 27,206                      | 41,174               |
| Gene density (genes/Mb)     | 139                    | 158                       | 227                         | 145                  |
| Average gene length (bp)    | 2,391                  | 2,080                     | 2,242                       | 2,015                |



**Supplementary Table 12. Genome size and gene number of completely sequenced plant species**

| <b>Plant species</b>              | <b>Abbreviation</b>                 | <b>Genome size</b> | <b>Gene number</b> |
|-----------------------------------|-------------------------------------|--------------------|--------------------|
| <i>Manihot esculenta</i>          | Mes                                 | 533                | 30,666             |
| <i>Ricinus communis</i>           | Rco                                 | 400                | 31,221             |
| <i>Linum usitatissimum</i>        | Lus                                 | 318.3              | 43,471             |
| <i>Populus trichocarpa</i>        | Ptr                                 | 422.9              | 41,335             |
| <i>Medicago truncatula</i>        | Mtr                                 | 257.6              | 44,135             |
| <i>Phaseolus vulgaris</i>         | Pvu                                 | 521.1              | 27,197             |
| <i>Glycine max</i>                | Gma                                 | 975                | 54,175             |
| <i>Cucumis sativus</i>            | Csa                                 | 203                | 21,491             |
| <i>Prunus persica</i>             | Ppe                                 | 227.3              | 27,864             |
| <i>Malus domestica</i>            | Mdo                                 | 881.3              | 63,538             |
| <i>Fragaria vesca</i>             | Fve                                 | 240                | 32,831             |
| <i>Arabidopsis thaliana</i>       | Ath                                 | 135                | 27,416             |
| <i>Arabidopsis lyrata</i>         | Aly                                 | 207                | 32,670             |
| <b><i>Camelina sativa</i></b>     | <b>Csa (<i>Camelina sativa</i>)</b> | <b>641.4</b>       | <b>89,421</b>      |
| <i>Capsella rubella</i>           | Cru                                 | 134.8              | 26,521             |
| <i>Brassica rapa</i>              | Bra                                 | 283.8              | 41,174             |
| <i>Thellungiella halophila</i>    | Tha                                 | 243.1              | 26,351             |
| <i>Carica papaya</i>              | Cpa                                 | 135                | 27,332             |
| <i>Gossypium raimondii</i>        | Gra                                 | 761.4              | 37,505             |
| <i>Theobroma cacao</i>            | Tca                                 | 346                | 29,452             |
| <i>Citrus sinensis</i>            | Csi                                 | 319                | 25,346             |
| <i>Eucalyptus grandis</i>         | Egr                                 | 691                | 36,376             |
| <i>Vitis vinifera</i>             | Vvi                                 | 487                | 26,346             |
| <i>Solanum tuberosum</i>          | Stu                                 | 800                | 35,119             |
| <i>Solanum lycopersicum</i>       | Sly                                 | 900                | 34,727             |
| <i>Mimulus guttatus</i>           | Mgu                                 | 321.7              | 26,718             |
| <i>Aquilegia coerulea</i>         | Aco                                 | 302                | 24,823             |
| <i>Sorghum bicolor</i>            | Sbi                                 | 697.5              | 34,496             |
| <i>Zea mays</i>                   | Zma                                 | 2066               | 39,656             |
| <i>Setaria italica</i>            | Sit                                 | 405.7              | 35,471             |
| <i>Panicum virgatum</i>           | Pvi                                 | 1358               | 65,878             |
| <i>Oryza sativa</i>               | Osa                                 | 372                | 39,049             |
| <i>Brachypodium distachyon</i>    | Bdi                                 | 272                | 26,552             |
| <i>Selaginella moellendorffii</i> | Smo                                 | 212.5              | 22,285             |
| <i>Physcomitrella patens</i>      | Ppa                                 | 480                | 32,272             |

**Supplementary Table 13. Comparison of sequence and structural features of orphan and non-orphan genes in the *Camelina sativa* genome**

|                   | Mean         |               | Median      |              |
|-------------------|--------------|---------------|-------------|--------------|
|                   | Orphans      | Non-Orphans   | Orphans     | Non-Orphans  |
| CDS length        | 324.54±3.389 | 1236.05±3.351 | 261.0±3.389 | 1020.0±3.351 |
| Percent GC        | 42.81±0.089  | 44.97±0.011   | 42.60±0.089 | 44.61±0.011  |
| Percent GC1       | 46.00±0.141  | 50.25±0.016   | 45.83±0.141 | 50.28±0.016  |
| Percent GC2       | 40.53±0.141  | 40.59±0.019   | 40.21±0.141 | 40.22±0.019  |
| Percent GC3       | 41.92±0.136  | 44.07±0.023   | 41.73±0.136 | 43.24±0.023  |
| Number of introns | 1.7±0.032    | 4.514±0.019   | 1.0±0.032   | 3.0±0.019    |

**Supplementary Table 14. Evolutionary origins of orphan genes in *Camelina sativa* genome**

| <b>Mode of evolution</b>                                   | <b>Number of orphans (% of orphans)</b> |
|------------------------------------------------------------|-----------------------------------------|
| Duplication                                                | 1737 (46.18%)                           |
| Out-of-frame CDS hits in Brassicaceae(Camelina specific)   | 210 (12.68%)                            |
| Non-coding region hits in Brassicaceae (Camelina specific) | 144 (8.69%)                             |
| Overlapping gene models                                    | 53 (1.41%)                              |
| Out-of-frame CDS hits in non-Brassicaceae                  | 16 (0.43%)                              |
| Non-coding region hits in non-Brassicaceae                 | 9 (0.24%)                               |

**Supplementary Table 15. Genomic composition of the three subgenomes within *Camelina sativa***

|                             | <b>Subgenome I</b>     | <b>Subgenome II</b>        | <b>Subgenome III</b>       |
|-----------------------------|------------------------|----------------------------|----------------------------|
| Number of chromosomes       | 6                      | 7                          | 7                          |
| Chromosomes                 | 17, 16, 15, 04, 13, 11 | 14, 07, 19, 06, 08, 10, 18 | 03, 05, 01, 09, 20, 02, 12 |
| Genome size (bp)            | 199,039,601            | 192,411,853                | 217,092,549                |
| Genic (bp)                  | 69,407,192             | 69,058,569                 | 71,249,998                 |
| Intergenic (bp)             | 75,467,826             | 73,080,545                 | 81,816,353                 |
| Transposable elements (bp)  | 54,164,583             | 50,272,739                 | 64,026,198                 |
| Number of genes             | 28,254                 | 27,813                     | 29,207                     |
| Syntenic genes              | 20,754                 | 20,605                     | 20,479                     |
| Syntenic genes retained (%) | 76%                    | 76%                        | 75%                        |
| Non-syntenic genes          | 7,500                  | 7,208                      | 8,728                      |
| Repeat content (bp)         | 54,164,583             | 50,272,739                 | 64,026,198                 |
| Repeat content (%)          | 27.21%                 | 26.13%                     | 29.49%                     |
| Gene density (genes/Mb)     | 142                    | 145                        | 135                        |

Supplementary Table 16. Comparison of GB associations of *Camelina sativa* karyotype with ancestral karyotypes in the Brassicaceae

| Chr       | GB Association | No. | Chr       | GB Association | No. | Chr        | GB Association | No. | Chr         | GB Association | No. | <i>C. sativa</i> Chromosomes                           |
|-----------|----------------|-----|-----------|----------------|-----|------------|----------------|-----|-------------|----------------|-----|--------------------------------------------------------|
| ACK (n=8) |                |     | PCK (n=7) |                |     | tPCK (n=7) |                |     | dACK (n=7)* |                |     |                                                        |
| AK1       | A/B            | 3   | AK1       | A/B            | 3   | AK1        | A/B            | 3   | AK1         | A/B            | 3   | Csa17, Csa14, Csa03                                    |
|           | B/C            | 4   |           | B/C            | 4   |            | B/C            | 4   |             | B/C            | 4   | Csa17, Csa14, Csa04, Csa05                             |
| AK2       | D/E            | 5   | AK2       | D/E            | 5   | AK2/5      | N/M            | 5   | AK2/4       | I/J            | 3   | Csa16, Csa07, Csa05                                    |
| AK3       | F/G            | 3   | AK3       | F/G            | 3   |            | M/E            | 0   |             | D/I            | 5   | Csa16, Csa16, Csa07, Csa07, Csa05                      |
|           | G/H            | 5   |           | G/H            | 5   | AK3        | F/G            | 3   |             | D/E            | 5   | Csa07, Csa07, Csa07, Csa05, Csa09                      |
| AK4       | I/J            | 3   | AK4       | I/J            | 3   |            | G/H            | 5   |             | I/E            | 8   | Csa16, Csa16, Csa16, Csa07, Csa07, Csa07, Csa09, Csa09 |
| AK5       | K/L            | 3   | AK7       | S/T            | 3   | AK4        | I/J            | 3   | AK3         | F/G            | 3   | Csa15, Csa19, Csa01                                    |
|           | L/M            | 3   |           | T/U            | 3   | AK7        | S/T            | 3   |             | G/H            | 5   | Csa15, Csa19, Csa01, Csa01, Csa01                      |
|           | M/N            | 3   | AK6/8     | O/P            | 4   |            | T/U            | 3   | AK5         | K/L            | 3   | Csa04, Csa06, Csa09                                    |
| AK6       | O/P            | 4   |           | P/W            | 0   | AK6/8      | O/P            | 4   |             | L/M            | 3   | Csa04, Csa06, Csa09                                    |
|           | P/Q            | 2   |           | W/R            | 0   |            | P/W            | 0   |             | M/N            | 3   | Csa04, Csa06, Csa09                                    |
|           | Q/R            | 3   | AK5/6/8   | N/M            | 3   |            | W/R            | 0   | AK6         | O/P            | 4   | Csa13, Csa08, Csa02, Csa02                             |
| AK7       | S/T            | 3   |           | M/V            | 0   | AK2/5/6    | N/M            | 3   |             | P/Q            | 2   | Csa13, Csa08                                           |
|           | T/U            | 3   |           | V/K            | 0   |            | D/V            | 0   |             | Q/R            | 3   | Csa13, Csa08, Csa20                                    |
| AK8       | V/W            | 2   |           | K/L            | 3   |            | V/K            | 0   | AK7         | S/T            | 3   | Csa11, Csa10, Csa12                                    |
|           | W/X            | 3   |           | L/Q            | 0   |            | K/L            | 3   |             | T/U            | 3   | Csa11, Csa10, Csa12                                    |
|           |                |     |           | Q/X            | 0   |            | L/Q            | 0   | AK8         | V/W            | 2   | Csa11, Csa18                                           |
|           |                |     |           |                |     |            | Q/X            | 0   |             | W/X            | 3   | Csa11, Csa18, Csa02                                    |

\*Inferred from the present study

**Supplementary Table 17. *Camelina sativa* genes retained in ancestral genomic blocks**

| <b>Block</b> | <b>Cs-G1</b> | <b>Cs-G2</b> | <b>Cs-G3</b> |
|--------------|--------------|--------------|--------------|
| A            | 1689         | 1653         | 1661         |
| B            | 1156         | 1158         | 1158         |
| C            | 750          | 767          | 752          |
| D            | 495          | 515          | 503          |
| E            | 1357         | 1366         | 1372         |
| F            | 2192         | 2183         | 2141         |
| G            | 99           | 94           | 93           |
| H            | 482          | 491          | 456          |
| I            | 678          | 668          | 694          |
| J            | 1612         | 1626         | 1638         |
| K            | 222          | 219          | 212          |
| L            | 330          | 334          | 342          |
| M            | 218          | 235          | 223          |
| N            | 1426         | 1414         | 1433         |
| O            | 406          | 399          | 415          |
| P            | 310          | 300          | 299          |
| Q            | 391          | 400          | 409          |
| R            | 1819         | 1818         | 1829         |
| S            | 446          | 445          | 438          |
| T            | 211          | 212          | 236          |
| U            | 2235         | 2204         | 2238         |
| V            | 486          | 482          | 479          |
| W            | 1121         | 1130         | 1138         |
| X            | 624          | 628          | 625          |
| <b>Total</b> | <b>20755</b> | <b>20741</b> | <b>20784</b> |

**Supplementary Table 18. Rate of gene loss in the sub-genomes of *Camelina sativa* and *Brassica rapa***

| <b>Sub-genomes</b>            | <b>Triplication age (Mya)</b> | <b>Fraction retained</b> | <b>Rate of gene loss (k)*</b> |
|-------------------------------|-------------------------------|--------------------------|-------------------------------|
| <b><i>Camelina sativa</i></b> |                               |                          |                               |
| Cs-G1                         | 5.41                          | 0.759306                 | 0.050897                      |
| Cs-G2                         | 5.41                          | 0.759280                 | 0.050903                      |
| Cs-G3                         | 5.41                          | 0.760969                 | 0.050492                      |
| <b><i>Brassica rapa</i></b>   |                               |                          |                               |
| LF                            | 22.50                         | 0.482921                 | 0.032351                      |
| MF1                           | 22.50                         | 0.321917                 | 0.050376                      |
| MF2                           | 22.50                         | 0.283525                 | 0.056020                      |

\*Rate of gene loss was calculated assuming that they are lost at a fixed rate

Exponential decay equation  $f = \exp(-Kt)$ , where  $t$  = time in million years,  $f$  = fraction retained, and  $k$  is the rate constant

**Supplementary Table 19. ANOVA test to determine significant differences in exon count between homeologues compared at genomic block and subgenome level**

Sample size (N)=Total df+1

| <b>Subgenomewise comparison</b> |         |         |       |        |        |          |              |
|---------------------------------|---------|---------|-------|--------|--------|----------|--------------|
|                                 |         | sos     | df    | ms     | F-test | P-value  | significance |
| Subgenomes                      | Between | 5.925   | 2     | 2.963  | 0.091  | 9.13E-01 | ns           |
|                                 | Within  | 1762130 | 54414 | 32.384 |        |          |              |
|                                 | Total   | 1762136 | 54422 |        |        |          |              |

sos, sum of squared deviations; df, degrees of freedom; ms, mean squares

| <b>Genomic blockwise comparison</b> |         |         |      |        |        |          |              |
|-------------------------------------|---------|---------|------|--------|--------|----------|--------------|
| Block                               |         | sos     | df   | ms     | F-test | P-value  | significance |
| Block A                             | Between | 4.178   | 2    | 2.089  | 0.057  | 9.45E-01 | ns           |
|                                     | Within  | 168963  | 4602 | 36.715 |        |          |              |
|                                     | Total   | 168967  | 4610 |        |        |          |              |
| Block B                             | Between | 5.174   | 2    | 2.587  | 0.085  | 9.18E-01 | ns           |
|                                     | Within  | 91812.6 | 3033 | 30.271 |        |          |              |
|                                     | Total   | 91817.8 | 3041 |        |        |          |              |
| Block C                             | Between | 15.534  | 2    | 7.767  | 0.181  | 8.35E-01 | ns           |
|                                     | Within  | 84752.7 | 1971 | 43     |        |          |              |
|                                     | Total   | 84768.2 | 1979 |        |        |          |              |
| Block D                             | Between | 13.354  | 2    | 6.677  | 0.204  | 8.15E-01 | ns           |
|                                     | Within  | 41198.6 | 1260 | 32.697 |        |          |              |
|                                     | Total   | 41211.9 | 1268 |        |        |          |              |
| Block E                             | Between | 16.335  | 2    | 8.168  | 0.235  | 7.90E-01 | ns           |
|                                     | Within  | 129054  | 3717 | 34.72  |        |          |              |
|                                     | Total   | 129071  | 3725 |        |        |          |              |
| Block F                             | Between | 7.329   | 2    | 3.664  | 0.108  | 8.98E-01 | ns           |
|                                     | Within  | 199852  | 5889 | 33.937 |        |          |              |
|                                     | Total   | 199860  | 5897 |        |        |          |              |
| Block G                             | Between | 7.056   | 2    | 3.528  | 0.121  | 8.87E-01 | ns           |
|                                     | Within  | 7113.46 | 243  | 29.274 |        |          |              |
|                                     | Total   | 7120.52 | 251  |        |        |          |              |
| Block H                             | Between | 32.826  | 2    | 16.413 | 0.473  | 6.23E-01 | ns           |
|                                     | Within  | 42389.1 | 1221 | 34.717 |        |          |              |
|                                     | Total   | 42422   | 1229 |        |        |          |              |
| Block I                             | Between | 0.041   | 2    | 0.021  | 0.001  | 9.99E-01 | ns           |
|                                     | Within  | 58089.8 | 1776 | 32.708 |        |          |              |
|                                     | Total   | 58089.9 | 1784 |        |        |          |              |
| Block J                             | Between | 0.222   | 2    | 0.111  | 0.003  | 9.97E-01 | ns           |
|                                     | Within  | 141805  | 4401 | 32.221 |        |          |              |
|                                     | Total   | 141806  | 4409 |        |        |          |              |



|         |         |         |      |        |       |          |    |
|---------|---------|---------|------|--------|-------|----------|----|
| Block K | Between | 5.016   | 2    | 2.508  | 0.097 | 9.07E-01 | ns |
|         | Within  | 14680.6 | 570  | 25.755 |       |          |    |
|         | Total   | 14685.6 | 578  |        |       |          |    |
| Block L | Between | 5.343   | 2    | 2.672  | 0.115 | 8.92E-01 | ns |
|         | Within  | 18905.5 | 813  | 23.254 |       |          |    |
|         | Total   | 18910.8 | 821  |        |       |          |    |
| Block M | Between | 28.772  | 2    | 14.386 | 0.443 | 6.43E-01 | ns |
|         | Within  | 17652.3 | 543  | 32.509 |       |          |    |
|         | Total   | 17681   | 551  |        |       |          |    |
| Block N | Between | 0.466   | 2    | 0.233  | 0.007 | 9.93E-01 | ns |
|         | Within  | 121437  | 3870 | 31.379 |       |          |    |
|         | Total   | 121437  | 3878 |        |       |          |    |
| Block O | Between | 0.511   | 2    | 0.256  | 0.009 | 9.91E-01 | ns |
|         | Within  | 31768.8 | 1098 | 28.933 |       |          |    |
|         | Total   | 31769.3 | 1106 |        |       |          |    |
| Block P | Between | 1.027   | 2    | 0.514  | 0.02  | 9.81E-01 | ns |
|         | Within  | 20020.2 | 768  | 26.068 |       |          |    |
|         | Total   | 20021.3 | 776  |        |       |          |    |
| Block Q | Between | 22.425  | 2    | 11.213 | 0.257 | 7.74E-01 | ns |
|         | Within  | 44188   | 1011 | 43.707 |       |          |    |
|         | Total   | 44210.5 | 1019 |        |       |          |    |
| Block R | Between | 1.847   | 2    | 0.923  | 0.029 | 9.72E-01 | ns |
|         | Within  | 160224  | 4965 | 32.271 |       |          |    |
|         | Total   | 160226  | 4973 |        |       |          |    |
| Block S | Between | 2.629   | 2    | 1.315  | 0.061 | 9.41E-01 | ns |
|         | Within  | 24046.8 | 1107 | 21.722 |       |          |    |
|         | Total   | 24049.4 | 1115 |        |       |          |    |
| Block T | Between | 4.922   | 2    | 2.461  | 0.084 | 9.19E-01 | ns |
|         | Within  | 15764.3 | 540  | 29.193 |       |          |    |
|         | Total   | 15769.2 | 548  |        |       |          |    |
| Block U | Between | 10.259  | 2    | 5.13   | 0.17  | 8.44E-01 | ns |
|         | Within  | 172025  | 5691 | 30.228 |       |          |    |
|         | Total   | 172035  | 5699 |        |       |          |    |
| Block V | Between | 8.662   | 2    | 4.331  | 0.128 | 8.80E-01 | ns |
|         | Within  | 14531.3 | 429  | 33.872 |       |          |    |
|         | Total   | 14540   | 437  |        |       |          |    |
| Block W | Between | 1.463   | 2    | 0.731  | 0.026 | 9.74E-01 | ns |
|         | Within  | 83693.8 | 3015 | 27.759 |       |          |    |
|         | Total   | 83695.2 | 3023 |        |       |          |    |
| Block X | Between | 2.604   | 2    | 1.302  | 0.04  | 9.61E-01 | ns |
|         | Within  | 54817.1 | 1674 | 32.746 |       |          |    |
|         | Total   | 54819.7 | 1682 |        |       |          |    |

**Supplementary Table 20. Homeologue silencing in *Camelina sativa***

Number of homeologous triplets where one or two homeologues were silenced (FPKM=0 across all tissue types) but remaining homeologues were expressed are presented

| Tissue type                                    | Subgenome to which silenced homeologue(s) belong |       |       |              |              |              |                  |
|------------------------------------------------|--------------------------------------------------|-------|-------|--------------|--------------|--------------|------------------|
|                                                | Cs-G1                                            | Cs-G2 | Cs-G3 | Cs-G1 and G2 | Cs-G1 and G3 | Cs-G2 and G3 | Cs-G1, G2 and G3 |
| Cotyledon ( C)                                 | 390                                              | 355   | 405   | 368          | 348          | 309          | 2169             |
| Early-mid seed development (EMSD; 18 & 22 DPA) | 465                                              | 440   | 420   | 344          | 345          | 285          | 1680             |
| Early seed development (ESD; 4-12 DPA)         | 461                                              | 442   | 418   | 319          | 278          | 281          | 1267             |
| Flower (F)                                     | 398                                              | 411   | 369   | 279          | 261          | 249          | 887              |
| Germinating seed (GS)                          | 413                                              | 429   | 430   | 336          | 292          | 306          | 1411             |
| Bud (B)                                        | 398                                              | 388   | 400   | 275          | 245          | 254          | 851              |
| Late seed development (LSD; 32 & 40 DPA)       | 529                                              | 500   | 525   | 499          | 490          | 481          | 3342             |
| Late-mid seed development (LMSD; 26 & 30 DPA)  | 460                                              | 417   | 453   | 412          | 379          | 336          | 2059             |
| Mature leaf (OL)                               | 456                                              | 456   | 449   | 416          | 402          | 410          | 2432             |
| Root ( R)                                      | 426                                              | 383   | 424   | 332          | 304          | 323          | 1502             |
| Stem (S)                                       | 387                                              | 383   | 410   | 340          | 327          | 330          | 1698             |
| Young leaf (YL)                                | 426                                              | 410   | 416   | 362          | 335          | 326          | 2404             |

Supplementary Table 21. Retention pattern of acyl-lipid metabolism genes in *Camelina sativa*

| Pathway                                                                                                                                  | Frequency                   |                                |                                                                                    |                        |           |           |           |              | Proportion (%)         |             |             |             |
|------------------------------------------------------------------------------------------------------------------------------------------|-----------------------------|--------------------------------|------------------------------------------------------------------------------------|------------------------|-----------|-----------|-----------|--------------|------------------------|-------------|-------------|-------------|
|                                                                                                                                          | <i>Arabidopsis thaliana</i> | <i>Camelina sativa</i> (Total) | Expansion of gene families in <i>C. sativa</i> in comparison to <i>A. thaliana</i> | <i>Camelina sativa</i> |           |           |           |              | <i>Camelina sativa</i> |             |             |             |
|                                                                                                                                          |                             |                                |                                                                                    | Syntenic               |           |           |           | Non-syntenic | Syntenic               |             |             |             |
|                                                                                                                                          |                             |                                |                                                                                    | Fully-retained         | 2 copy    | 1 copy    | 0 copy    |              | Fully-retained         | 2 copy      | 1 copy      | 0 copy      |
| Fatty Acid Synthesis                                                                                                                     | 34                          | 93                             | 173.5%                                                                             | 26                     | 2         | 0         | 6         | 11           | 76.5%                  | 5.9%        | 0.0%        | 17.6%       |
| Fatty Acid Synthesis; Prokaryotic Galactolipid, Sulfolipid, & Phospholipid Synthesis 1                                                   | 15                          | 45                             | 200.0%                                                                             | 11                     | 2         | 0         | 2         | 8            | 73.3%                  | 13.3%       | 0.0%        | 13.3%       |
| Fatty Acid Elongation & Wax Biosynthesis                                                                                                 | 198                         | 651                            | 228.8%                                                                             | 149                    | 26        | 11        | 12        | 141          | 75.3%                  | 13.1%       | 5.6%        | 6.1%        |
| Fatty Acid Elongation, Desaturation & Export From Plastid                                                                                | 14                          | 42                             | 200.0%                                                                             | 11                     | 1         | 0         | 2         | 7            | 78.6%                  | 7.1%        | 0.0%        | 14.3%       |
| Triacylglycerol Biosynthesis                                                                                                             | 70                          | 192                            | 174.3%                                                                             | 48                     | 12        | 8         | 2         | 16           | 68.6%                  | 17.1%       | 11.4%       | 2.9%        |
| Triacylglycerol & Fatty Acid Degradation                                                                                                 | 64                          | 204                            | 218.8%                                                                             | 55                     | 5         | 4         | 0         | 25           | 85.9%                  | 7.8%        | 6.3%        | 0.0%        |
| Eukaryotic Galactolipid & Sulfolipid Synthesis                                                                                           | 65                          | 201                            | 209.2%                                                                             | 59                     | 3         | 2         | 1         | 16           | 90.8%                  | 4.6%        | 3.1%        | 1.5%        |
| Prokaryotic Galactolipid, Sulfolipid, & Phospholipid Synthesis 1                                                                         | 7                           | 22                             | 214.3%                                                                             | 7                      | 0         | 0         | 0         | 1            | 100.0%                 | 0.0%        | 0.0%        | 0.0%        |
| Prokaryotic Galactolipid, Sulfolipid, & Phospholipid Synthesis 2                                                                         | 4                           | 12                             | 200.0%                                                                             | 4                      | 0         | 0         | 0         | 0            | 100.0%                 | 0.0%        | 0.0%        | 0.0%        |
| Prokaryotic Galactolipid, Sulfolipid, & Phospholipid Synthesis 2; Eukaryotic Galactolipid & Sulfolipid Synthesis                         | 10                          | 34                             | 240.0%                                                                             | 9                      | 0         | 0         | 1         | 7            | 90.0%                  | 0.0%        | 0.0%        | 10.0%       |
| Prokaryotic Galactolipid, Sulfolipid, & Phospholipid Synthesis 1; Eukaryotic Galactolipid & Sulfolipid Synthesis; Phospholipid Signaling | 9                           | 29                             | 222.2%                                                                             | 8                      | 1         | 0         | 0         | 3            | 88.9%                  | 11.1%       | 0.0%        | 0.0%        |
| Cutin Synthesis & Transport 1                                                                                                            | 26                          | 81                             | 211.5%                                                                             | 22                     | 1         | 1         | 2         | 12           | 84.6%                  | 3.8%        | 3.8%        | 7.7%        |
| Suberin Synthesis & Transport 1                                                                                                          | 47                          | 151                            | 221.3%                                                                             | 42                     | 0         | 2         | 3         | 23           | 89.4%                  | 0.0%        | 4.3%        | 6.4%        |
| Mitochondrial Fatty Acid & Lipoic Acid Synthesis                                                                                         | 10                          | 32                             | 220.0%                                                                             | 8                      | 1         | 0         | 1         | 6            | 80.0%                  | 10.0%       | 0.0%        | 10.0%       |
| Mitochondrial Lipopolysaccharide Synthesis                                                                                               | 12                          | 23                             | 91.7%                                                                              | 6                      | 1         | 1         | 4         | 2            | 50.0%                  | 8.3%        | 8.3%        | 33.3%       |
| Mitochondrial Phospholipid Synthesis                                                                                                     | 14                          | 43                             | 207.1%                                                                             | 14                     | 0         | 0         | 0         | 1            | 100.0%                 | 0.0%        | 0.0%        | 0.0%        |
| Oxylipin Metabolism 1                                                                                                                    | 17                          | 50                             | 194.1%                                                                             | 10                     | 1         | 1         | 5         | 17           | 58.8%                  | 5.9%        | 5.9%        | 29.4%       |
| Oxylipin Metabolism 2                                                                                                                    | 3                           | 13                             | 333.3%                                                                             | 3                      | 0         | 0         | 0         | 4            | 100.0%                 | 0.0%        | 0.0%        | 0.0%        |
| Oxylipin Metabolism 1; Oxylipin Metabolism 2                                                                                             | 43                          | 159                            | 269.8%                                                                             | 42                     | 1         | 0         | 0         | 31           | 97.7%                  | 2.3%        | 0.0%        | 0.0%        |
| Oxylipin Metabolism 1; Oxylipin Metabolism 2; Phospholipid Signaling                                                                     | 6                           | 20                             | 233.3%                                                                             | 5                      | 1         | 0         | 0         | 3            | 83.3%                  | 16.7%       | 0.0%        | 0.0%        |
| Phospholipid Signaling                                                                                                                   | 91                          | 296                            | 225.3%                                                                             | 78                     | 7         | 3         | 3         | 45           | 85.7%                  | 7.7%        | 3.3%        | 3.3%        |
| Sphingolipid Biosynthesis 1                                                                                                              | 17                          | 55                             | 223.5%                                                                             | 15                     | 0         | 2         | 0         | 8            | 88.2%                  | 0.0%        | 11.8%       | 0.0%        |
| Sphingolipid Biosynthesis 1; Sphingolipid Biosynthesis 2                                                                                 | 5                           | 14                             | 180.0%                                                                             | 4                      | 0         | 0         | 1         | 2            | 80.0%                  | 0.0%        | 0.0%        | 20.0%       |
| Sphingolipid Biosynthesis 2                                                                                                              | 7                           | 24                             | 242.9%                                                                             | 6                      | 1         | 0         | 0         | 4            | 85.7%                  | 14.3%       | 0.0%        | 0.0%        |
| Lipid Trafficking                                                                                                                        | 10                          | 36                             | 260.0%                                                                             | 9                      | 0         | 0         | 1         | 9            | 90.0%                  | 0.0%        | 0.0%        | 10.0%       |
| Pathway, function or subcellular location uncertain                                                                                      | 58                          | 202                            | 248.3%                                                                             | 40                     | 12        | 5         | 1         | 53           | 69.0%                  | 20.7%       | 8.6%        | 1.7%        |
| <b>Total</b>                                                                                                                             | <b>856</b>                  | <b>2724</b>                    | <b>217.0%</b>                                                                      | <b>691</b>             | <b>78</b> | <b>40</b> | <b>47</b> | <b>455</b>   | <b>83.5%</b>           | <b>6.5%</b> | <b>2.8%</b> | <b>7.2%</b> |

**Supplementary Table 22. Roche 454 pyrosequencing, read filtering and transcriptome assembly statistics for lower chromosome number *Camelina* species**

| <b>Species</b>                             | <b>Total raw reads</b> | <b>Total data (bp)</b> | <b>Clean data (bp)</b> | <b>Number of isogroups</b> | <b>Number of isotigs</b> |
|--------------------------------------------|------------------------|------------------------|------------------------|----------------------------|--------------------------|
| <i>Camelina hispida</i>                    | 730,040                | 289,831,958            | 253,990,405            | 23,391                     | 30,639                   |
| <i>Camelina laxa</i>                       | 727,870                | 285,946,338            | 240,013,877            | 20,963                     | 22,477                   |
| <i>Camelina rumelica</i> ssp. Iran         | 736,560                | 320,322,283            | 263,285,196            | 23,906                     | 32,239                   |
| <i>Camelina rumelica</i> ssp. transcaspica | 749,447                | 303,539,215            | 256,396,754            | 21,260                     | 27,891                   |
| <i>Camelina rumelica</i> ssp. USSR         | 803,764                | 340,536,335            | 290,533,930            | 25,088                     | 38,567                   |

**Supplementary Table 23. Complete mixture model estimates of  $K_s$  distributions**

|                                       | No. of duplicate pairs | G (# Gaussian components) | Chisquare | p-value | mean ln ( $K_s$ ) | variance ln ( $K_s$ ) | fraction of data | mean $K_s$ | Merged peak* | Associated polyploidy event |                      |
|---------------------------------------|------------------------|---------------------------|-----------|---------|-------------------|-----------------------|------------------|------------|--------------|-----------------------------|----------------------|
| <i>Camelina sativa</i>                | 194806                 | 9                         | 631.50177 | 6E-89   | -2.68059          | 0.16064               | 0.1615667        | 0.068522   | 0.082        | Recent Mesopolyploidy       |                      |
|                                       |                        |                           |           |         | -2.4552           | 2.28313               | 0.1080536        | 0.085846   |              |                             |                      |
|                                       |                        |                           |           |         | -2.225            | 0.10002               | 0.09422479       | 0.108068   |              |                             |                      |
|                                       |                        |                           |           |         | -1.23511          | 0.18329               | 0.09686181       | 0.290803   | 0.755        | $\alpha$ Duplication        |                      |
|                                       |                        |                           |           |         | -0.49729          | 0.08261               | 0.09721083       | 0.60818    |              |                             |                      |
|                                       |                        |                           |           |         | -0.07711          | 0.05289               | 0.1032682        | 0.925786   |              |                             |                      |
|                                       |                        |                           |           |         | 0.715967          | 0.18678               | 0.1103641        | 2.046165   |              |                             | $\beta$ duplication  |
|                                       |                        |                           |           |         | 1.976215          | 0.95901               | 0.1548896        | 7.215381   |              |                             | $\gamma$ duplication |
| 4.21513                               | 0.0044                 | 0.07356034                | 67.70297  |         |                   |                       |                  |            |              |                             |                      |
| Cs-G1-- <i>A. thaliana</i>            | 15647                  | 3                         | 65.561246 | 1E-05   | -1.33366          | 0.06465               | 0.7519223        | 0.263511   | 0.286        |                             |                      |
|                                       |                        |                           |           |         | -0.9975           | 0.22271               | 0.2369449        | 0.368801   |              |                             |                      |
|                                       |                        |                           |           |         | 0.708826          | 3.00966               | 0.01113282       | 2.031604   |              |                             |                      |
| Cs-G2-- <i>A. thaliana</i>            | 16421                  | 3                         | 99.272658 | 3E-10   | -1.33388          | 0.06729               | 0.7858025        | 0.263454   | 0.285        |                             |                      |
|                                       |                        |                           |           |         | -0.94712          | 0.24577               | 0.2035503        | 0.387858   |              |                             |                      |
|                                       |                        |                           |           |         | 0.730498          | 2.827                 | 0.01064716       | 2.076113   |              |                             |                      |
| Cs-G3-- <i>A. thaliana</i>            | 15675                  | 3                         | 67.105546 | 6E-06   | -1.32159          | 0.06784               | 0.7918447        | 0.26671    | 0.287        |                             |                      |
|                                       |                        |                           |           |         | -0.96337          | 0.2744                | 0.2007897        | 0.381605   |              |                             |                      |
|                                       |                        |                           |           |         | 1.115325          | 3.49089               | 0.00736565       | 3.050559   |              |                             |                      |
| <i>C. sativa</i> --<br>Mesopolyploidy | 43350                  | 4                         | 109.83305 | 0.0002  | -2.75942          | 0.23293               | 0.2996091        | 0.063328   | 0.089        |                             |                      |
|                                       |                        |                           |           |         | -2.42505          | 0.1138                | 0.4112391        | 0.088474   |              |                             |                      |
|                                       |                        |                           |           |         | -2.0529           | 1.31612               | 0.2841752        | 0.128362   |              |                             |                      |
|                                       |                        |                           |           |         | 3.468451          | 0.98736               | 0.00497664       | 32.087     |              |                             |                      |

\*Components shaded in tan colour were merged as described in **Supplementary Note 9**.

## Supplementary Notes

### 1. Genome sequencing and assembly strategy

The presence of repetitive sequences in eukaryotic genomes can have a direct bearing on the completeness and contiguity of draft genomes assembled via whole genome shotgun sequencing approach. Paired-end deep sequencing with a combination of short, medium and long insert sizes is required to achieve maximal coverage of the genome and generate megabase sized contiguous scaffolds. To ensure genome-wide deep coverage and generate contiguous chromosome scale super-scaffolds, we used a hybrid sequencing and hierarchical assembly approach (**Supplementary Fig. 2**), utilizing a combination of Illumina and Roche 454 next generation sequencing technologies. Illumina sequencing of short span paired-end and mate-paired reads enables ultra-deep coverage at moderate cost, whereas, the longer reads along with medium to long span mate-paired reads generated by 454 pyrosequencing aid in resolving repeats and bridging low complexity regions.

The implementation of a hierarchical assembly strategy, based on (i) production of larger contigs with fewer gaps and greater accuracy of the final consensus sequence by assembling the larger pool of short span Illumina reads using SOAPdenovo<sup>1</sup>, (ii) construction of superscaffolds by joining contigs with the help of medium to long span 454 mate-pair read information using Bambus superscaffolder<sup>2</sup>, and (iii) construction of chromosome-scale pseudomolecules by ordering and orienting scaffolds via anchoring to comprehensive genetic linkage map(s) developed by high density sequence tag mapping in segregating population, has been proven in our laboratories to be a highly efficient and cost effective strategy for assembling high quality draft genomes of various plant species, including *C. sativa* (this study) and a few other Brassicaceae species.

### 2. Estimation of genome size

#### 2.1. Flow cytometric estimation

Nuclei were extracted from young leaf tissue of *C. sativa* following the protocol described by Galbraith et al.<sup>3</sup> with minor alterations. Approximately 2 cm<sup>2</sup> of tissue was chopped in 0.5 ml of lysis buffer (0.1M Tris-HCl pH7; 2 mM MgCl<sub>2</sub>; 0.1M NaCl; 0.05% Triton) at room temperature.

The volume of buffer was adjusted to 1 ml and filtered through a 30 µm pore prior to analysis. DNA content of the nuclei from each species was estimated using DAPI staining and fluorescence measurements made using the CyFlow Ploidy analyser (Partec NJ, USA). A standard curve was generated by linear regression using the fluorescence data and genome size estimates for the genomes of *A. thaliana*, *B. carinata*, *B. juncea*, *B. napus*, *B. nigra*, *B. oleracea* and *B. rapa*. The genome size for *C. sativa* was estimated using their fluorescence measurement and the standard curve. This analysis revealed the genome size of *C. sativa* to be 825 Mb (1C content of 0.84 pg).

## ***2.2. k-mer frequency analysis based genome size estimation***

Analysis of k-mer frequency distribution in short read data provides a true estimate of the sequencing depth that can be utilized to determine the genome size<sup>4</sup>. The real sequencing depth ( $N$ ) is correlated with the peak of the k-mer frequency ( $M$ ) in sequenced reads, read length ( $L$ ) and k-mer length ( $K$ ), and can be derived using the formula  $N=M * L/(L-K+1)$ <sup>4</sup>. To determine the genome size of *C. sativa*, the occurrences of 17 and 21 bp k-mers in ~53 Gb of filtered Illumina PE data were counted using Jellyfish<sup>5</sup>. Genome size was estimated by dividing the total length of sequencing reads used in the analysis by sequencing depth (**Supplementary Fig. 3**). This analysis suggested a genome of 785 Mb, which is in agreement with the average of flow cytometry based estimates of 750 Mb<sup>6</sup> and 825 Mb.

## **3. Genome assembly validation**

### ***3.1 Alignment of BAC sequences to the genome assembly***

The quality of the genome assembly was assessed by comparing it with a set of BAC scaffolds independently assembled from Illumina sequence generated from 768 indexed and pooled BACs. The alignment of all BAC scaffolds >50Kb to the *C. sativa* genome assembly using NUCmer (version 3.07)<sup>7</sup> showed no misassemblies (**Supplementary Table 5**).

### ***3.2 Evaluation of assembled and unassembled short reads***

To assess overall genome coverage and structural completeness of the *de novo* assembly, all filtered short Illumina reads (982 million) were mapped back to the assembled genome using Bowtie (version 2.1.0)<sup>8</sup>, with parameters requiring end to end mapping and allowing only 2 mismatches per read. Overall, 84% of the Illumina reads could be aligned to the assembly (**Supplementary Table 6**). The proportion of unmapped reads (16%) is largely consistent with the estimated unassembled portion (18%) of the genome, likely enriched with repetitive sequences, indicating good coverage of the euchromatic genome space.

### ***3.3 Genomic mapping of EST sequences***

To assess coverage of gene space in the genome assembly, *C. sativa* ESTs derived from 454 or Sanger cDNA reads were aligned back to the genome sequence using GMAP (release 2012-01-11)<sup>9</sup>. About 99% of *C. sativa* ESTs aligned to the genome sequence with sequence coverage of at least 90% and identity greater than 99% (**Supplementary Table 7**), again confirming high coverage of the gene complement in the assembly and gene annotations.

### ***3.4 CEGMA analysis***

CEGMA pipeline<sup>10</sup>, which provides a rapid and accurate method for annotation of a set of 248 highly conserved core eukaryotic genes (CEGs) that are expected to be present in all eukaryotes, was used to assess completeness of the gene catalogue in the assembled genome. This analysis revealed the *C. sativa* genome assembly and annotated gene set harbour 99.6% (247/248) of complete CEG models (**Supplementary Table 8**), thus demonstrating the completeness and very high coverage of gene complement in *the draft* assembly.

### ***3.5 Collinearity analysis***

The draft genome sequence of *C. sativa* was compared to other sequenced crucifer genomes, including *A. thaliana*, *A. lyrata* and *B. rapa*, by NUCmer<sup>7</sup>. A striking degree of synteny conservation was observed between the draft genome sequence of *C. sativa* and *Arabidopsis* species (**Fig. 3; Supplementary Fig. 7**). This comparative analysis also identified a few misassembled scaffolds, which were split and repositioned to correct false joins or insertions by utilizing additional evidence from the genetic map.



#### 4. Orphan genes in *Camelina sativa*

Orphan genes have been identified in almost all biological domains of life yet their origins and biological functions remain poorly understood<sup>11</sup>. Orphan genes arising in specific lineages can potentially acquire lineage-specific functions, including in plant species such as rice<sup>12</sup>, pigeonpea<sup>13</sup> and *A. thaliana*<sup>14</sup> where lineage-specific orphan genes have been identified.

To identify orphan genes restricted to the *C. sativa* genome, we used a BLAST-based filtering approach to firstly identify all of the Brassicaceae-specific orphans. A total of 3,761 Brassicaceae-restricted orphan genes were identified from the 89,418 *C. sativa* gene models, which represents 4.2% of the protein-coding genome. The BLAST-filtering approach was then further extended to identify the subset of Brassicaceae-restricted orphan genes that are found only in the *C. sativa* genome, resulting in the identification of 1,656 protein-coding orphans (1.85% of the *C. sativa* genome). This indicates that there are 1,656 protein-coding orphan genes in *C. sativa* that could be candidate genes for lineage-specific adaptations in this species.

The characterization of features associated with the orphan genes in *C. sativa* revealed that they have shorter sequence length, lower GC content and lower numbers of introns (than non-orphan genes) (**Supplementary Table 13**). The percentage of orphan genes on each chromosome in *C. sativa* exhibited no major bias towards any specific chromosome (**Supplementary Fig. 13**). Such characteristics are consistent with findings of other studies<sup>13, 14, 15</sup>.

Using a BLAST-based sequence similarity approach, we identified the evolutionary origins of 2,169 of the 3,761 Brassicaceae-restricted orphan genes found within the *C. sativa* genome (**Supplementary Table 14**). A total of 1,737 of these orphan genes have significant BLASTP hits with *C. sativa* non-orphan genes which indicates that nearly half of *C. sativa* orphan genes have arisen by gene duplication of non-orphan genes. An additional 367 orphans were found to have a significant BLASTN hit at CDS level. A total of 354 (9.4%) orphans have significant BLASTN hits with other Brassicaceae species at either CDS or non-coding level. A small number of orphans (0.7%) have displayed significant similarity to non-coding or out-of-frame CDS in non-Brassicaceae species. A total of 53 orphan genes were found to have arisen by overprinting (i.e. generating a new ORF from an existing ORF) of other non-orphan genes. For the orphan genes whose mode of origin we could decipher, our analysis indicates that gene

duplication from non-orphan genes was the predominant (46.18%) mechanism by which orphan genes have arisen in the *C. sativa* genome.

## **5. Phylogenetic analysis of *Camelina* species**

### ***5.1. RNA extraction and mRNA enrichment***

Total cellular RNA was extracted using the ToTALLY RNA kit (Ambion) according to the manufacturer's instructions. The integrity and quantity of total RNA was assessed using RNA 6000 Nano labchip on a BioAnalyzer (Agilent). Poly(A)<sup>+</sup> RNA was purified from DNase I-treated total RNA samples by two sequential rounds of oligo(dT) enrichment using the Poly(A) Purist mRNA isolation kit (Ambion). The concentration of mRNA was checked using Ribogreen (Molecular Probes) and the quality was verified using RNA 6000 Pico labchip on a BioAnalyzer (Agilent).

### ***5.2. cDNA library construction and 454 sequencing***

cDNA library construction and sequencing was performed according to standard Roche 454 FLX and Titanium protocols. Briefly, mRNA was fragmented with a zinc chloride based RNA fragmentation solution. Double stranded (ds)-cDNA was synthesized from purified fragmented mRNA using Roche's cDNA synthesis system and random hexamer primers. Subsequent steps, including end-polishing of ds-cDNA, adapter ligation, removal of smaller fragments, and quality and quantity assessment of the final library, were performed as per standard instructions provided in cDNA rapid library preparation guide (Roche). For sequencing, adapter ligated DNA fragments were denatured to generate a single-stranded library, which was then amplified by emulsion PCR. Individual titrated single strand DNA libraries were sequenced in one half-plate run on the 454 GS-FLX platform using Titanium chemistry. For each species, on average about half a million reads were generated (**Supplementary Table 22**).

### ***5.3. De novo sequence assembly***

A rigorous read pre-processing pipeline was adapted, utilizing in turn (i) the in-built quality, adapter and length trimming tool in the CLCbio genomics workbench (<http://www.clcbio.com>), (ii) CD-HIT-454 read clustering program<sup>16</sup> and (iii) the SILVA comprehensive ribosomal RNA database<sup>17</sup>. Standard flowgram files (SFF) generated by 454 sequencing were initially imported

into the CLCbio genomics workbench 4.7 and reads were trimmed, by removing adapter sequences, ambiguous nucleotides and low quality sequence, using default settings. Filtered reads were clustered at 100% identity using CD-HIT-454, and exactly identical PCR duplicates were removed. Any reads shorter than 100 bp were also removed. Subsequently, ribosomal RNA reads were identified based on significant nucleotide similarity [BLASTN<sup>18</sup> with E-value cutoff of 1E-40, identity >85% and match length >50 bp] to the SILVA rRNA database and discarded.

The clean, unique and non-ribosomal reads were assembled using the 454 GS *De novo* Assembler software (Version 2.6). An incremental transcriptome (-cDNA flag) assembly approach was implemented through a command line interface with parameters, including isogroup threshold (-ig) of 10000, isotig threshold (-it) of 10000, isotig contig count threshold (-icc) of 200, minimum overlap length (-ml) of 125 and minimum identity (-mi) of 98%. Additionally, the use read tips (-urt) option that helps in obtaining contigs from rare or low coverage transcripts was activated.

For each assembly, the 454 GS *De novo* Assembler generated isogroup (analogous to genes) and corresponding isotig (analogous to individual transcripts) sequences. Different isotigs within an isogroup are considered to represent alternative splice variants of the same gene. In almost all transcript assemblies we noticed substantial redundancy among isotigs belonging to a subset of isogroups, some of which were nearly identical. The unusually inflated number of isotigs per isogroup is likely an artifact of the greedy assembly algorithm. To avoid bias in downstream analyses due to redundancy, only one isotig (longest) per isogroup was selected for subsequent phylogenetic analysis.

The 454 GS *De novo* assembler trims the polyA tails prior to assembling, so the true orientation of reads in the assembly cannot be determined and an isotig may be output as the reverse complement of the true biological transcript. The orientation of isotigs from each species was determined by aligning (BLASTX with E-value cutoff of 1E-20) them against the *A. thaliana* proteome database and improperly oriented isotigs were reverse complemented.

#### **5.4. Phylogenetic analysis**

Individual isotig sequences from each *Camelina* species and coding DNA sequences (CDS) of the three sub-genomes (Cs-G1/2/3) of *C. sativa*, were mapped (BLASTN with E-value cut off of

1E-06) onto full-length CDS of *A. thaliana*. The reciprocal best BLAST hit method was used to determine putative orthologues between *A. thaliana* and each of the *Camelina* species. Based on this analysis, a phylogenomic data matrix consisting of 4,867 unique orthologous gene sets was constructed. Sequences from individual orthologous gene sets were locally aligned using ClustalW<sup>19</sup>. Gaps and missing data from each alignment were removed using an automated alignment trimming tool trimAL<sup>20</sup> with a gap threshold (-gt) value set to 1. Trimmed alignments were concatenated using the Phyutility program<sup>21</sup> to produce the final data matrix comprising a total alignment length of 3,484,241 bps. Phylogenetic analysis was performed using the optimality criteria of Maximum Likelihood (ML) implemented in RAxML<sup>22</sup>. ML tree was calculated assuming GTR+GAMMA model of sequence evolution. Robustness of phylogenetic inference was assessed by running 1000 bootstrap replicates using GTR+CAT approximation. Final tree was visualized using the interactive Tree of Life [iTOL<sup>23</sup>] web server.

## **6. Construction of a 40 kb mate-pair library**

Approximately 40 µg of high quality genomic DNA was sheared using Hydroshear device (Genomic solutions; shearing assembly size: large, volume: 140 µl, speed code: 25 and cycle number: 20). About 10 µg of sheared DNA was end-repaired to create blunt ends with 5' phosphate groups for ligation into the blunt, dephosphorylated fosmid vector. End-repaired DNA fragments were resolved by field inversion gel electrophoresis (FIGE; program: 7 and runtime: 20 hrs) and 30-75 kb fragments were recovered from the gel using Elutrap electroelution system (Whatman) and concentrated using Microcon-YM-50 columns. Eluted fragments were then ligated to the pNGS-FOS vector (Lucigen) and packaged *in vitro* using Gigapack III Gold (Agilent) bacteriophage lambda packaging extract. Packaged fosmids were transfected into the replicator fos strain (Lucigen) and plated on agar plates containing chloramphenicol and 1X arabinose induction medium. A pool of 300,000-500,000 fosmid colonies was removed en masse and recombinant fosmid DNA was purified using the Qiagen large construct kit. Next, purified fosmid library was digested with *Bfa*I restriction enzyme. The linearized vector and remnant anchored paired-ends from completely digested fosmid inserts were purified, and re-ligated to reconstitute the restriction site and create a mate-pair junction. Mate-pair insert DNA molecules were enriched for 454 sequencing by PCR amplification using a custom set of primers (Titan-A:

CCA TCT CAT CCC TGC GTG TCT CCG ACT CAG and Titan-B: CCT ATC CCC TGT GTG CCT TGG CAG TCT CAG).

## 7. Read filtering and correction

All Illumina reads were filtered using Trimmomatic (version 0.17) (<http://www.usadellab.org/cms/index.php?page=trimmomatic>) by (i) removing adapter sequences, (ii) trimming leading and trailing low quality sequences (below 15), (iii) scanning the read with a 4-base wide sliding window and cutting when the average quality per base dropped below 15, and (iv) keeping only those pairs where both reads were longer than 55 bp. Additionally, PCR duplicates and reads with ambiguous residues (Ns) were removed using custom Perl scripts.

454 pyrosequencing reads generated for 15-25 kb mate-pair libraries were pre-processed using SFFtoCA module (generated by 454 life sciences; <http://sourceforge.net/apps/mediawiki/wgs-assembler/index.php?title=SffToCA>), which removes perfect prefix duplicates and splits each read into two mate-paired reads based on the presence of the titanium linker sequence. Sequencing datasets generated for 40 kb mate-pair library by 454 sequencing were filtered by (i) removing vector and adapter sequences, (ii) splitting each read into mate-paired reads based on the presence of *BfaI* restriction site, and (iii) keeping only those mate-pairs where both reads were longer than 50 bp.

## 8. Statistical test for single outlier

The statistical test for a single outlier was carried out after log transforming the x (Genome size) and y (Gene number) data and fitting the linear regression to it. The test statistic was the maximum of the absolute values of the residual ( $y - \text{the predicted value of } y$ ) divided by its estimated standard deviation. The formula for the estimated standard deviation of the residuals and the critical values of the test statistic under the assumption that the residuals are independent can be found in Barnett and Lewis<sup>24</sup> and Tietjen Moore and Beckman<sup>25</sup>. The critical values (for which there are slight discrepancies) for the test reported here were obtained from Barnett and Lewis<sup>24</sup>. The curves for the confidence intervals in Figure 2 are the sets of points for which if *C. sativa* was placed at that point, the most outlying point (*C. sativa*) is just significant at the 5% and 1% levels.

## 9. Mixture model analysis of $Ks$ distributions

Estimation of the level of synonymous substitution ( $Ks$ ) between paralogous and orthologous sequences was carried out using the Bioperl<sup>26</sup> script bp\_pairwise\_kaks.pl, which takes a pair of sequences as an input, translates them into their corresponding protein sequences, aligns the protein sequences using ClustalW<sup>19</sup>, and then using the protein alignments together with the cDNA sequences calculates the  $Ka$ ,  $Ks$ , and  $Ka/Ks$  ratio by implementing the codeml method of the PAML distribution<sup>27</sup>. Synonymous substitution rate of  $8.22 \times 10^{-9}$  substitutions/synonymous site/year for Brassicaceae species was extrapolated based on a fossil established age of 22.5 Mya for the whole genome triplication event in diploid brassicas<sup>28</sup>. Mixture model analysis of  $Ks$  distributions was performed to account for multiple duplication events within each lineage.

Each  $Ks$  dataset was trimmed by removing values of 0.001 or less because they are affected by rounding errors and result in spurious frequency peaks. Histograms were generated using log transformed  $Ks$  values with a bin width of 0.1 (**Supplementary Fig. 10**). To identify significant peaks in the  $\ln(Ks)$  distribution, Gaussian mixture models were fitted to the  $\ln(Ks)$  values using the R package Mclust, and the number of Gaussian components ( $G$ ), the mean of each component and corresponding variance, standard deviation and fractions of data were calculated. The Bayesian Information Criterion (BIC) was used to determine the best fitting model to the data. The number of Gaussian components was increased to improve the fit, if necessary. All  $Ks$  data were included to develop the best fitting model and this allowed the detection of weak Gaussian components with means up to about 20.  $Ks$  values beyond 20 are difficult to meaningfully interpret and we restricted the display of our results to this boundary.

The fit of the determined models were confirmed by  $\chi^2$  tests. The upper limit of  $\ln(Ks) = 3$  in the  $\chi^2$  calculation was used to cut-off the  $Ks$  values beyond  $\sim 20$ . The number of degrees of freedom for the model was estimated as  $3(G-1)$  for the single species datasets (that had a spurious peak around  $Ks=68$ ) and  $3G$  for the interspecific comparisons accounting for the number of parameters that significantly affect the model for  $Ks < 20$ .

In the comparison involving all paralogous and orthologous gene pairs, skewed peaks were observed in the distribution of  $Ks$  values (**Supplementary Fig. 10**), this deviation resulted from

the combined effects of multiple overlapping Gaussian components. These complications were resolved by combining overlapping Gaussian components and representing them with the mean and standard deviation of their Gaussian mixtures (**Supplementary Table 23**). Thus for a Gaussian mixture distribution  $x \sim \sum_i \pi_i N(\mu_i, \sigma_i^2)$  with proportions  $\pi_i$  that sum to 1, with means  $\mu_i$ , and standard deviations  $\sigma_i$ , we determine the combined mean as  $\bar{x} = \sum_i \pi_i \mu_i$  and the combined standard deviation as  $\sqrt{V(x)} = \sqrt{\sum_i \pi_i (\sigma_i^2 + \mu_i^2) - (\sum_i \pi_i \mu_i)^2}$  enabling these peaks to be plotted as single points (**Supplementary Fig. 10**). The number of Gaussian components, Chi-square statistics, the ln-transformed mean of each component and corresponding variance and standard deviation are provided in **Supplementary Table 23**.

## Supplementary References

1. Luo, R, *et al.* SOAPdenovo2: an empirically improved memory-efficient short-read de novo assembler. *Gigascience* **1**, 18 (2012).
2. Pop, M., Kosack, D.S. & Salzberg, S.L. Hierarchical scaffolding with Bambus. *Genome Res.* **14**, 149-159 (2004).
3. Galbraith, D.W., Harkins, K.R., Maddox, J.M., Ayres, N.M., Sharma, D.P. & Firoozabady, E. Rapid flow cytometric analysis of the cell cycle in intact plant tissues. *Science* **220**, 1049-1051 (1983).
4. Li, R., *et al.* The sequence and de novo assembly of the giant panda genome. *Nature* **463**, 311-317 (2010).
5. Marcais, G. & Kingsford, C. A fast, lock-free approach for efficient parallel counting of occurrences of k-mers. *Bioinformatics* **27**, 764-770 (2011).
6. Hutcheon, C., *et al.* Polyploid genome of *Camelina sativa* revealed by isolation of fatty acid synthesis genes. *BMC Plant Biol.* **10**, 233 (2010).
7. Kurtz, S., *et al.* Versatile and open software for comparing large genomes. *Genome Biol.* **5**, R12 (2004).
8. Langmead, B. & Salzberg, S.L. Fast gapped-read alignment with Bowtie 2. *Nat. Methods* **9**, 357-359 (2012).
9. Wu, T.D. & Watanabe, C.K. GMAP: a genomic mapping and alignment program for mRNA and EST sequences. *Bioinformatics* **21**, 1859-1875 (2005).
10. Parra, G., Bradnam, K. & Korf, I. CEGMA: a pipeline to accurately annotate core genes in eukaryotic genomes. *Bioinformatics* **23**, 1061-1067 (2007).
11. Tautz, D. & Domazet-Lošo, T. The evolutionary origin of orphan genes. *Nat. Rev. Genet.* **12**, 692-702 (2011).
12. Guo, W.J., Li, P., Ling, J. & Ye, S.P. Significant comparative characteristics between orphan and nonorphan genes in the rice (*Oryza sativa* L.) genome. *Comp. Func. Genomics* **2007**, 21676 (2007).
13. Varshney, R.K., *et al.* Draft genome sequence of pigeonpea (*Cajanus cajan*), an orphan legume crop of resource-poor farmers. *Nat. Biotechnol.* **30**, 83-89 (2012).
14. Donoghue, M.T., Keshavaiah, C., Swamidatta, S.H. & Spillane, C. Evolutionary origins of Brassicaceae specific genes in *Arabidopsis thaliana*. *BMC Evol. Biol.* **11**, 47 (2011).
15. Wilson, G.A., Feil, E.J., Lilley, A.K. & Field, D. Large-scale comparative genomic ranking of taxonomically restricted genes (TRGs) in bacterial and archaeal genomes. *PLoS ONE* **2**, e324 (2007).
16. Li, W. & Godzik, A. Cd-hit: a fast program for clustering and comparing large sets of protein or nucleotide sequences. *Bioinformatics* **22**, 1658-1659 (2006).
17. Quast, C, *et al.* The SILVA ribosomal RNA gene database project: improved data processing and web-based tools. *Nucleic Acids Res.* **41**, D590-596 (2013).
18. Altschul, S.F., Gish, W., Miller, W., Myers, E.W. & Lipman, D.J. Basic local alignment search tool. *J. Mol. Biol.* **215**, 403-410 (1990).
19. Larkin, M.A., *et al.* Clustal W and Clustal X version 2.0. *Bioinformatics* **23**, 2947-2948 (2007).
20. Capella-Gutierrez, S., Silla-Martinez, J.M. & Gabaldon, T. trimAl: a tool for automated alignment trimming in large-scale phylogenetic analyses. *Bioinformatics* **25**, 1972-1973 (2009).



21. Smith, S.A. & Dunn, C.W. Phyutility: a phyloinformatics tool for trees, alignments and molecular data. *Bioinformatics* **24**, 715-716 (2008).
22. Stamatakis, A. RAxML-VI-HPC: maximum likelihood-based phylogenetic analyses with thousands of taxa and mixed models. *Bioinformatics* **22**, 2688-2690 (2006).
23. Letunic, I. & Bork, P. Interactive Tree Of Life v2: online annotation and display of phylogenetic trees made easy. *Nucleic Acids Res.* **39**, W475-478 (2011).
24. Barnett, V. & Lewis, T. Outliers in Statistical Data” (2nd Edition), Wiley series in Probability and Mathematical Statistics. (1978).
25. Tietjen, G.L., Moore, R.H. & Beckman, R.J. Testing for a single outlier in simple linear regression. *Technometrics* **15**, 717-721 (1973).
26. Stajich, J.E., *et al.* The Bioperl toolkit: Perl modules for the life sciences. *Genome Res.* **12**, 1611-1618 (2002).
27. Yang, Z. PAML 4: phylogenetic analysis by maximum likelihood. *Mol. biol. evol.* **24**, 1586-1591 (2007).
28. Beilstein, M.A., Nagalingum, N.S., Clements, M.D., Manchester, S.R. & Mathews, S. Dated molecular phylogenies indicate a Miocene origin for *Arabidopsis thaliana*. *Proc. Natl. Acad. Sci. USA* **107**, 18724-18728 (2010).
29. Johnston, J.S. *et al.* Evolution of genome size in Brassicaceae. *Ann. Bot.* **95**, 229-235 (2005).
30. Haudry, A., *et al.* An atlas of over 90,000 conserved noncoding sequences provides insight into crucifer regulatory regions. *Nat Genet.* 45,891–898 (2013).
31. Lysak, M.A., Koch, M.A., Beaulieu, J.M., Meister, A. & Leitch, I.J. The dynamic ups and downs of genome size evolution in Brassicaceae. *Mol. Biol. Evol.* **26**, 85-98 (2009).
32. Wu, H.J. *et al.* Insights into salt tolerance from the genome of *Thellungiella salsuginea*. *Proc. Natl. Acad. Sci. USA* **109**, 12219-12224 (2012).
33. Dassanayake, M. *et al.* The genome of the extremophile crucifer *Thellungiella parvula*. *Nat. Genet.* **43**, 913-918 (2011).
34. Koch, M.A. *et al.* BrassiBase: Tools and biological resources to study characters and traits in the Brassicaceae-version 1.1. *Taxon* **61**, 1001-1009 (2012).
35. Cantarel, B.L. *et al.* MAKER: an easy-to-use annotation pipeline designed for emerging model organism genomes. *Genome Res.* **18**, 188-196 (2008).
36. Haas, B.J. *et al.* Improving the Arabidopsis genome annotation using maximal transcript alignment assemblies. *Nucleic Acids Res.* **31**, 5654-5666 (2003).
